# Supplementary material for: Theoretical investigation of multi-spin excited states of anthracene radical-linked π-conjugated spin systems by computational chemistry
Source: Royal Society of Chemistry journal article supplement (doi:10.1039/d3cp06335f), 2024-01-01
Supplement: d3cp06335f1.pdf [file d3cp06335f1.pdf]

**Supplementary Information for**  
**“Theoretical investigation for multi-spin excited states of anthracene-radical  $\pi$ -  
conjugated spin systems by computational chemistry”**

Ken Kato <sup>\*a</sup> and Yoshio Teki<sup>\*b</sup>

<sup>a</sup> *Institute for Protein Research, Osaka University, 3-2 Yamadaoka, Suita-shi, Osaka  
565-0871, Japan.*

<sup>b</sup> *Graduate School of Science, Osaka Metropolitan University, 3-3-138 Sugimoto,  
Sumiyoshi-ku, Osaka 558-8585, Japan*

\*To whom Correspondence should be addressed.

E-mail: [katoken@protein.osaka-u.ac.jp](mailto:katoken@protein.osaka-u.ac.jp)

E-mail: [teki@omu.ac.jp](mailto:teki@omu.ac.jp)

Fax: (+)81-6-6605-2559

**Table S1.** Calculated exchange interaction ( $J_{DQ}$ ) obtained using the broken-symmetry method,  $g$  value and  $D_{SS}$  value for Q state of **pOV0a** for various functionals and basis-sets by the DFT method.

| Functional | Basis-set       | $J_{DQ} / \text{cm}^{-1}$ | $g$       | $D_{SS} / \text{cm}^{-1}$ |
|------------|-----------------|---------------------------|-----------|---------------------------|
| B3LYP      | 6-31G (d,p)     | 84.82                     | 2.0028809 | 0.01402                   |
|            | 6-311G (2d, 2p) | 66.97                     | 2.0029693 | 0.01402                   |
|            | Def2-SVP        | 68.53                     | 2.0028976 | 0.01381                   |
|            | Def2-TZVB       | 55.04                     | 2.0029720 | 0.01395                   |
| CAM-B3LYP  | 6-31G (d,p)     | 88.62                     | 2.0029098 | 0.01402                   |
|            | 6-311G (2d, 2p) | 66.73                     | 2.0030012 | 0.01401                   |
|            | Def2-SVP        | 70.49                     | 2.0029270 | 0.01382                   |
|            | Def2-TZVB       | 54.09                     | 2.0030030 | 0.01398                   |
| O3LYP      | 6-31G (d,p)     | 79.49                     | 2.0028645 | 0.01423                   |
|            | 6-311G (2d, 2p) | 68.76                     | 2.0029455 | 0.01427                   |
|            | Def2-SVP        | 64.28                     | 2.0028827 | 0.01404                   |
|            | Def2-TZVB       | 64.36                     | 2.0029558 | 0.01417                   |
| B3PW91     | 6-31G (d,p)     | 87.78                     | 2.0028722 | 0.01396                   |
|            | 6-311G (2d, 2p) | 73.34                     | 2.0029577 | 0.01400                   |
|            | Def2-SVP        | 68.22                     | 2.0028929 | 0.01395                   |
|            | Def2-TZVB       | 67.42                     | 2.0029623 | 0.01394                   |

**Table S2.** Calculated exchange interaction ( $J_{DQ}$ ) for Q state of **pOV0a** obtained by CASSCF method.

| Method                        | Basis-set       | $J_{DQ} / \text{cm}^{-1}$ |
|-------------------------------|-----------------|---------------------------|
| CASSCF (3e, 3o)               | 6-31G (d,p)     | 53.5                      |
| CASSCF (3e, 3o)/ QD-NEVPT2    | Def2-TZVB/RI-JK | 7.87                      |
| CASSCF (13e, 13o)             | 6-31G (d,p)     | 32.3                      |
| CASSCF (13e, 13o) / NEVPT2    | 6-31G (d,p)     | 8.34                      |
| CASSCF (13e, 13o) / QD-NEVPT2 | 6-31G (d,p)     | 11.8                      |

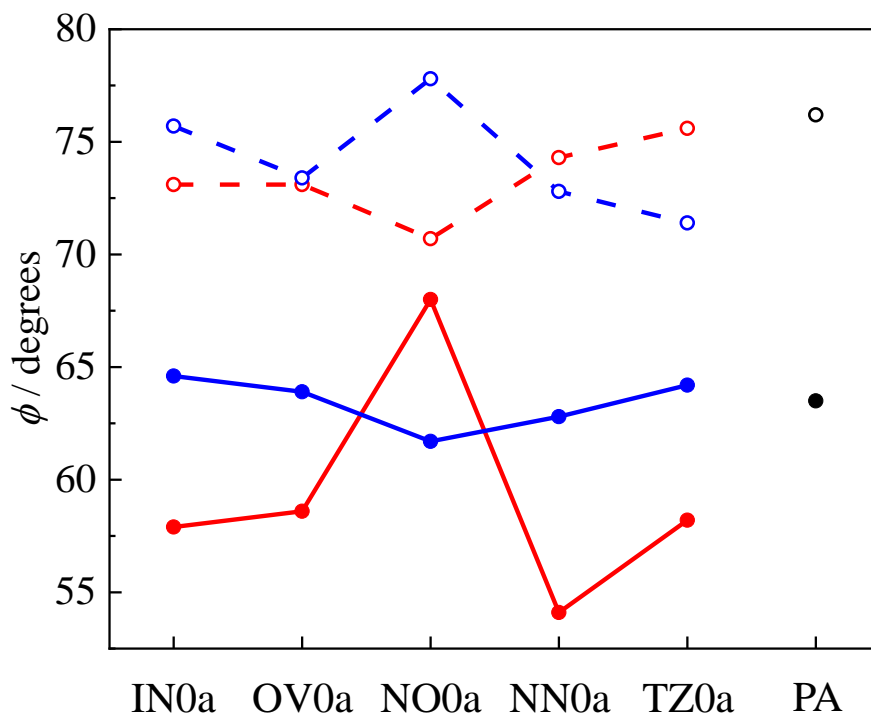

**Fig. S1.** Dihedral angles in Q state between the anthracene and phenyl moiety for each radical substituent; para (red) joint, meta (blue) joint and phenylanthracene (black). Open and closed circles correspond to the ground state and excited state, respectively.

**Table S3.** Results of the calculation for anthracene-radical linked  $\pi$ -conjugated spin systems

| Sample       | State          | $\phi / ^\circ$ | Total Energy /<br>Hartree | $\langle S^2 \rangle$ | $\Delta E_{DQ} / \text{cm}^{-1}$ | $J_{DQ} / \text{cm}^{-1}$ | $r_{\text{An-R}} / \text{\AA}$ |
|--------------|----------------|-----------------|---------------------------|-----------------------|----------------------------------|---------------------------|--------------------------------|
| <b>pIN0a</b> | D              | 58.6            | -1227.79977               | 1.778833              | 102.0797566                      | 50.65374478               | 5.792                          |
|              | Q              |                 | -1227.800235              | 3.794079              |                                  |                           |                                |
|              | D <sub>0</sub> | 73.1            | -1227.863991              | 0.769468              |                                  |                           |                                |
| <b>pIN1a</b> | D              | 57.1            | -1534.821701              | 1.789118              | 25.16585529                      | 12.55439151               | 12.685                         |
|              | Q              |                 | -1534.821816              | 3.793664              |                                  |                           |                                |
|              | D <sub>0</sub> | 71.6            | -1534.885511              | 0.770315              |                                  |                           |                                |
| <b>pIN2a</b> | D              | 58.5            | --                        | --                    | --                               | --                        | 19.574                         |
|              | Q              |                 | -1841.843517              | 3.792421              |                                  |                           |                                |
|              | D <sub>0</sub> | 75.2            | -1841.907264              | 0.770462              |                                  |                           |                                |
| <b>pIN3a</b> | D              | 58.3            | --                        | --                    | --                               | --                        | 26.463                         |
|              | Q              |                 | -2148.865286              | 3.792113              |                                  |                           |                                |
|              | D <sub>0</sub> | 74.9            | -2148.929013              | 0.770454              |                                  |                           |                                |
| <b>pIN4a</b> | D              | 58.1            | --                        | --                    | --                               | --                        | 33.351                         |
|              | Q              |                 | -2455.887053              | 3.792061              |                                  |                           |                                |
|              | D <sub>0</sub> | 74.3            | -2455.950745              | 0.770441              |                                  |                           |                                |
| <b>pIN5a</b> | D              | 58.2            | --                        | --                    | --                               | --                        | 40.237                         |
|              | Q              |                 | -2762.908813              | 3.791986              |                                  |                           |                                |
|              | D <sub>0</sub> | 72              | -2762.97245               | 0.77045               |                                  |                           |                                |
| <b>pIN0b</b> | D              | 1.4             | -1303.926554              | 1.777757              | 316.5743791                      | 155.9487382               | 8.320                          |
|              | Q              |                 | -1303.927996              | 3.807747              |                                  |                           |                                |
|              | D <sub>0</sub> | 3.0             | -1303.981464              | 0.770371              |                                  |                           |                                |
| <b>pIN1b</b> | D              | 0.7             | -1610.949499              | 1.796768              | 66.07258909                      | 32.87165685               | 15.210                         |
|              | Q              |                 | -1610.949800              | 3.806785              |                                  |                           |                                |
|              | D <sub>0</sub> | 1.9             | -1611.003214              | 0.770319              |                                  |                           |                                |
| <b>pIN2b</b> | D              | 1.0             | -1917.971458              | 1.801424              | 12.79642489                      | 6.389095207               | 22.097                         |
|              | Q              |                 | -1917.971517              | 3.804278              |                                  |                           |                                |
|              | D <sub>0</sub> | 4.6             | -1918.024982              | 0.770426              |                                  |                           |                                |
| <b>pIN3b</b> | D              | 1.0             | -2224.993262              | 1.80259               | 2.423414401                      | 1.211272354               | 28.976                         |
|              | Q              |                 | -2224.993273              | 3.803308              |                                  |                           |                                |
|              | D <sub>0</sub> | 4.9             | -2225.046749              | 0.770416              |                                  |                           |                                |

|              |                |      |              |          |              |              |        |
|--------------|----------------|------|--------------|----------|--------------|--------------|--------|
| <b>pIN4b</b> | D              | 0.2  | -2532.014989 | 1.802956 | 0.431302751  | 0.215633154  | 35.873 |
|              | Q              |      | -2532.014991 | 3.803125 |              |              |        |
|              | D <sub>0</sub> | 2.9  | -2532.068428 | 0.770452 |              |              |        |
| <b>pIN0a</b> | D              | 63.9 | -1227.799026 | 1.792665 | -26.71643238 | -13.38817222 | 5.792  |
|              | Q              |      | -1227.798904 | 3.78819  |              |              |        |
|              | D <sub>0</sub> | 73.4 | -1227.863386 | 0.769387 |              |              |        |
| <b>mIN1a</b> | D              | 58.1 | -1534.819377 | 1.7921   | -7.621582493 | -3.81405417  | 11.472 |
|              | Q              |      | -1534.819343 | 3.790389 |              |              |        |
|              | D <sub>0</sub> | 72.2 | -1534.88438  | 0.769666 |              |              |        |
| <b>mIN2a</b> | D              | 57.2 | -1841.842311 | 1.791556 | -1.62093627  | -0.810665127 | 18.249 |
|              | Q              |      | -1841.842303 | 3.79107  |              |              |        |
|              | D <sub>0</sub> | 72.6 | -1841.906063 | 0.769663 |              |              |        |
| <b>mIN3a</b> | D              | 58.8 | -2148.864048 | 1.790998 | -0.270987483 | -0.13550072  | 25.105 |
|              | Q              |      | -2148.864047 | 3.790895 |              |              |        |
|              | D <sub>0</sub> | 75.0 | -2148.927944 | 0.769578 |              |              |        |
| <b>mIN4a</b> | D              | 58.1 | -2455.885923 | 1.791205 | -0.079934818 | -0.039968049 | 31.94  |
|              | Q              |      | -2455.885923 | 3.791173 |              |              |        |
|              | D <sub>0</sub> | 73.1 | -2455.949700 | 0.769696 |              |              |        |
| <b>mIN5a</b> | D              | 57.0 | -2762.907685 | 1.791345 | -0.015898716 | -0.007949378 | 38.834 |
|              | Q              |      | -2762.907685 | 3.79134  |              |              |        |
|              | D <sub>0</sub> | 73.1 | -2762.971468 | 0.769722 |              |              |        |
| <b>mIN0b</b> | D              | 1.2  | -1303.924159 | 1.804668 | -88.95481336 | -44.76033677 | 7.264  |
|              | Q              |      | -1303.923754 | 3.792026 |              |              |        |
|              | D <sub>0</sub> | 0.8  | -1303.980224 | 0.769653 |              |              |        |
| <b>mIN1b</b> | D              | 0.0  | -1610.948417 | 1.803835 | -20.60692885 | -10.32515758 | 13.895 |
|              | Q              |      | -1610.948323 | 3.799633 |              |              |        |
|              | D <sub>0</sub> | 0.0  | -1611.000879 | 0.770011 |              |              |        |
| <b>mIN2b</b> | D              | 0.2  | -1917.970361 | 1.8028   | -4.148752507 | -2.075571783 | 20.695 |
|              | Q              |      | -1917.970342 | 3.801648 |              |              |        |
|              | D <sub>0</sub> | 1.0  | -1918.023858 | 0.769672 |              |              |        |
| <b>mIN3b</b> | D              | 0.2  | -2224.990995 | 1.802714 | -0.806485671 | -0.403300104 | 27.522 |
|              | Q              |      | -2224.990991 | 3.80243  |              |              |        |
|              | D <sub>0</sub> | 0.2  | -2225.034546 | 0.770001 |              |              |        |
| <b>mIN4b</b> | D              | 0.3  | -2532.0128   | 1.802599 | -0.138161542 | -0.06908312  | 34.344 |

|              |                |      |              |          |             |          |        |
|--------------|----------------|------|--------------|----------|-------------|----------|--------|
|              | Q              |      | -2532.012799 | 3.802531 |             |          |        |
|              | D <sub>0</sub> | 0.0  | -2532.066289 | 0.770009 |             |          |        |
| <b>pOV0a</b> | D              | 57.9 | -1219.407667 | 1.791571 | 148.3943621 | 73.93077 | 5.801  |
|              | Q              |      | -1219.408343 | 3.798778 |             |          |        |
|              | D <sub>0</sub> | 73.1 | -1219.472056 | 0.774374 |             |          |        |
| <b>pOV1a</b> | D              | 57.3 | -1526.429746 | 1.794654 | 33.57934167 | 16.78326 | 12.694 |
|              | Q              |      | -1526.429899 | 3.795418 |             |          |        |
|              | D <sub>0</sub> | 73.8 | -1526.493680 | 0.775339 |             |          |        |
| <b>pOV2a</b> | D              | 58.3 | -1833.451640 | 1.796222 | 6.470587472 | 3.233224 | 19.585 |
|              | Q              |      | -1833.451669 | 3.797502 |             |          |        |
|              | D <sub>0</sub> | 74.3 | -1833.515445 | 0.775406 |             |          |        |
| <b>pOV3a</b> | D              | 58.2 | -2140.473435 | 1.796717 | 1.233892814 | 0.616841 | 26.474 |
|              | Q              |      | -2140.473441 | 3.797058 |             |          |        |
|              | D <sub>0</sub> | 73.6 | -2140.537236 | 0.775402 |             |          |        |
| <b>pOV4a</b> | D              | 58.0 | -2447.495205 | 1.796894 | 0.247238167 | 0.123614 | 33.360 |
|              | Q              |      | -2447.495206 | 3.796974 |             |          |        |
|              | D <sub>0</sub> | 73.6 | -2447.558966 | 0.775399 |             |          |        |
| <b>pOV5a</b> | D              | 58.0 | -2754.516973 | 1.796894 | 0.039239927 | 0.01962  | 40.242 |
|              | Q              |      | -2754.516973 | 3.796934 |             |          |        |
|              | D <sub>0</sub> | 73.3 | -2754.580718 | 0.775403 |             |          |        |
| <b>pOV0b</b> | D              | 0.1  | -1295.534266 | 1.793046 | 452.5772032 | 225.6419 | 8.399  |
|              | Q              |      | -1295.536328 | 3.798778 |             |          |        |
|              | D <sub>0</sub> | 2.3  | -1295.589548 | 0.775663 |             |          |        |
| <b>pOV1b</b> | D              | 1.0  | -1602.557536 | 1.802684 | 90.04512808 | 44.81186 | 15.220 |
|              | Q              |      | -1602.557946 | 3.812088 |             |          |        |
|              | D <sub>0</sub> | 3.4  | -1602.611317 | 0.775413 |             |          |        |
| <b>pOV2b</b> | D              | 0.4  | -1909.579571 | 1.806394 | 17.14164227 | 8.557706 | 22.111 |
|              | Q              |      | -1909.579649 | 3.809459 |             |          |        |
|              | D <sub>0</sub> | 1.0  | -1909.633104 | 0.775399 |             |          |        |
| <b>pOV3b</b> | D              | 0.1  | -2216.601395 | 1.807566 | 3.21393339  | 1.60631  | 29.000 |
|              | Q              |      | -2216.601409 | 3.808384 |             |          |        |
|              | D <sub>0</sub> | 0.3  | -2216.654886 | 0.775408 |             |          |        |
| <b>pOV4b</b> | D              | 0.0  | -2523.623180 | 1.807871 | 0.606305095 | 0.304813 | 35.831 |
|              | Q              |      | -2523.623183 | 3.796974 |             |          |        |

|              |                |      |              |          |              |              |        |
|--------------|----------------|------|--------------|----------|--------------|--------------|--------|
|              | D <sub>0</sub> | 0.8  | -2523.676664 | 0.775404 |              |              |        |
| <b>mOV0a</b> | D              | 64.6 | -1219.407316 | 1.792757 | -51.32328808 | -25.66377413 | 5.015  |
|              | Q              |      | -1219.407082 | 3.792591 |              |              |        |
|              | D <sub>0</sub> | 75.7 | -1219.471681 | 0.774205 |              |              |        |
| <b>mOV1a</b> | D              | 57.7 | -1526.428746 | 1.795924 | -15.67742183 | -7.844025242 | 11.529 |
|              | Q              |      | -1526.428675 | 3.794569 |              |              |        |
|              | D <sub>0</sub> | 71.9 | -1526.492567 | 0.774211 |              |              |        |
| <b>mOV2a</b> | D              | 57.3 | -1833.450629 | 1.79606  | -3.255894713 | -1.628402495 | 18.376 |
|              | Q              |      | -1833.450614 | 3.795501 |              |              |        |
|              | D <sub>0</sub> | 71.3 | -1833.51433  | 0.774207 |              |              |        |
| <b>mOV3a</b> | D              | 57.8 | -2140.47242  | 1.795817 | -0.583207609 | -0.291625677 | 25.261 |
|              | Q              |      | -2140.472418 | 3.795667 |              |              |        |
|              | D <sub>0</sub> | 71.7 | -2140.53616  | 0.774202 |              |              |        |
| <b>mOV4a</b> | D              | 57.5 | -2447.493783 | 1.795822 | -0.100473291 | -0.050237751 | 31.602 |
|              | Q              |      | -2447.493783 | 3.795778 |              |              |        |
|              | D <sub>0</sub> | 70.9 | -2447.55746  | 0.774196 |              |              |        |
| <b>mOV5a</b> | D              | 57.6 | -2754.515808 | 1.795782 | -0.007710074 | -0.003855056 | 38.543 |
|              | Q              |      | -2754.515808 | 3.795772 |              |              |        |
|              | D <sub>0</sub> | 73.4 | -2754.579605 | 0.774189 |              |              |        |
| <b>mOV0b</b> | D              | 0.5  | -1295.533412 | 1.797127 | -182.7566158 | -91.44529155 | 7.335  |
|              | Q              |      | -1295.532579 | 3.795662 |              |              |        |
|              | D <sub>0</sub> | 2.2  | -1295.587947 | 0.774705 |              |              |        |
| <b>mOV1b</b> | D              | 2.1  | -1602.556626 | 1.80687  | -39.42844288 | -19.74662565 | 14.080 |
|              | Q              |      | -1602.556446 | 3.803588 |              |              |        |
|              | D <sub>0</sub> | 4.0  | -1602.609779 | 0.774651 |              |              |        |
| <b>mOV2b</b> | D              | 1.3  | -1909.578537 | 1.8072   | -7.801290517 | -3.903149129 | 20.665 |
|              | Q              |      | -1909.578501 | 3.805917 |              |              |        |
|              | D <sub>0</sub> | 11.1 | -1909.631774 | 0.774209 |              |              |        |
| <b>mOV3b</b> | D              | 1.1  | -2216.600266 | 1.806912 | -1.470791431 | -0.735528846 | 27.432 |
|              | Q              |      | -2216.600259 | 3.80655  |              |              |        |
|              | D <sub>0</sub> | 3.4  | -2216.653752 | 0.774191 |              |              |        |
| <b>mOV4b</b> | D              | 1.7  | -2523.621874 | 1.806803 | -0.253043254 | -0.126527194 | 34.200 |
|              | Q              |      | -2523.621873 | 3.806715 |              |              |        |
|              | D <sub>0</sub> | 5.6  | -2523.675383 | 0.774185 |              |              |        |



|                     |                |      |              |          |              |              |        |
|---------------------|----------------|------|--------------|----------|--------------|--------------|--------|
| <b><i>pNO0a</i></b> | D              | 68   | -1057.016993 | 1.720346 | -447.3831063 | -217.2912397 | 5.801  |
|                     | Q              |      | -1057.014955 | 3.779256 |              |              |        |
|                     | D <sub>0</sub> | 70.7 | -1057.079929 | 0.762029 |              |              |        |
| <b><i>pNO1a</i></b> | D              | 61.9 | -1364.038712 | 1.775148 | -141.172028  | -70.27410242 | 12.638 |
|                     | Q              |      | -1364.038069 | 3.784025 |              |              |        |
|                     | D <sub>0</sub> | 75.2 | -1364.102308 | 0.76678  |              |              |        |
| <b><i>pNO2a</i></b> | D              | 59.1 | -1671.060409 | 1.787384 | -33.77530611 | -16.89207878 | 19.521 |
|                     | Q              |      | -1671.060255 | 3.78686  |              |              |        |
|                     | D <sub>0</sub> | 73.9 | -1671.124138 | 0.767299 |              |              |        |
| <b><i>pNO3a</i></b> | D              | 58.0 | -1978.082157 | 1.788881 | -6.865499094 | -3.433855249 | 26.408 |
|                     | Q              |      | -1978.082126 | 3.788237 |              |              |        |
|                     | D <sub>0</sub> | 76.0 | -1978.145879 | 0.767308 |              |              |        |
| <b><i>pNO4a</i></b> | D              | 58.9 | -2285.103761 | 1.788749 | -1.142946855 | -0.571530581 | 33.287 |
|                     | Q              |      | -2285.103756 | 3.788549 |              |              |        |
|                     | D <sub>0</sub> | 75.3 | -2285.167654 | 0.767291 |              |              |        |
| <b><i>pNO5a</i></b> | D              | 58.1 | -2592.123377 | 1.78129  | -0.128607662 | -0.064305053 | 40.174 |
|                     | Q              |      | -2592.123377 | 3.781252 |              |              |        |
|                     | D <sub>0</sub> | 73.0 | -2592.187103 | 0.75968  |              |              |        |
| <b><i>pNO0b</i></b> | D              | 0.9  | -1133.149261 | 1.347395 | -2078.815416 | -856.7809856 | 8.299  |
|                     | Q              |      | -1133.139789 | 3.773704 |              |              |        |
|                     | D <sub>0</sub> | 1.0  | -1133.198258 | 0.770672 |              |              |        |
| <b><i>pNO1b</i></b> | D              | 0.2  | -1440.167596 | 1.747331 | -462.0670742 | -226.5348939 | 15.172 |
|                     | Q              |      | -1440.16549  | 3.787048 |              |              |        |
|                     | D <sub>0</sub> | 1.0  | -1440.220038 | 0.767513 |              |              |        |
| <b><i>pNO2b</i></b> | D              | 0.3  | -1747.188566 | 1.794618 | -94.24745872 | -47.11006744 | 22.057 |
|                     | Q              |      | -1747.188136 | 3.795198 |              |              |        |
|                     | D <sub>0</sub> | 1.3  | -1747.241826 | 0.767256 |              |              |        |
| <b><i>pNO3b</i></b> | D              | 0.5  | -2054.210172 | 1.799866 | -17.94058908 | -8.976371544 | 28.942 |
|                     | Q              |      | -2054.21009  | 3.798512 |              |              |        |
|                     | D <sub>0</sub> | 1.7  | -2054.263613 | 0.767346 |              |              |        |
| <b><i>pNO4b</i></b> | D              | 0.2  | -2361.231878 | 1.79975  | -3.277304388 | -1.639077535 | 35.820 |
|                     | Q              |      | -2361.231864 | 3.799231 |              |              |        |
|                     | D <sub>0</sub> | 1.3  | -2361.285399 | 0.767326 |              |              |        |
| <b><i>mNO0a</i></b> | D              | 61.7 | -1057.014833 | 1.776833 | 178.8051248  | 88.98845463  | 5.004  |

|              |                |      |              |          |             |             |        |
|--------------|----------------|------|--------------|----------|-------------|-------------|--------|
|              | Q              |      | -1057.015648 | 3.78614  |             |             |        |
|              | D <sub>0</sub> | 77.8 | -1057.079897 | 0.761636 |             |             |        |
| <b>mNO1a</b> | D              | 57.7 | --           | --       | --          | --          | 11.536 |
|              | Q              |      | -1364.036734 | 3.786921 |             |             |        |
|              | D <sub>0</sub> | 76.9 | -1364.100548 | 0.762846 |             |             |        |
| <b>mNO2a</b> | D              | 57.8 | --           | --       | --          | --          | 18.333 |
|              | Q              |      | -1671.058503 | 3.785376 |             |             |        |
|              | D <sub>0</sub> | 74   | -1671.122273 | 0.762688 |             |             |        |
| <b>mNO3a</b> | D              | 57.9 | --           | --       | --          | --          | 25.174 |
|              | Q              |      | -1978.08028  | 3.784722 |             |             |        |
|              | D <sub>0</sub> | 73.8 | -1978.144045 | 0.762619 |             |             |        |
| <b>mNO4a</b> | D              | 58.3 | --           | --       | --          | --          | 32.049 |
|              | Q              |      | -2285.102075 | 3.784488 |             |             |        |
|              | D <sub>0</sub> | 73.8 | -2285.165763 | 0.762882 |             |             |        |
| <b>mNO5a</b> | D              | 58.0 | --           | --       | --          | --          | 38.858 |
|              | Q              |      | -2592.123815 | 3.784418 |             |             |        |
|              | D <sub>0</sub> | 73.6 | -2592.187546 | 0.76287  |             |             |        |
| <b>mNO0b</b> | D              | 0.6  | -1133.139942 | 1.773243 | 510.7526616 | 251.9724351 | 7.333  |
|              | Q              |      | -1133.142269 | 3.800261 |             |             |        |
|              | D <sub>0</sub> | 2.2  | -1133.196211 | 0.762967 |             |             |        |
| <b>mNO1b</b> | D              | 0.3  | -1440.164206 | 1.78807  | 117.3219274 | 58.29310505 | 14.006 |
|              | Q              |      | -1440.16474  | 3.800691 |             |             |        |
|              | D <sub>0</sub> | 1.1  | -1440.218165 | 0.762658 |             |             |        |
| <b>mNO2b</b> | D              | 0.1  | -1747.186394 | 1.793106 | 23.23673722 | 11.59411373 | 20.825 |
|              | Q              |      | -1747.1865   | 3.79729  |             |             |        |
|              | D <sub>0</sub> | 0.9  | -1747.239953 | 0.762645 |             |             |        |
| <b>mNO3b</b> | D              | 0    | -2054.208241 | 1.794629 | 4.399974061 | 2.198741443 | 27.677 |
|              | Q              |      | -2054.208261 | 3.795762 |             |             |        |
|              | D <sub>0</sub> | 0.8  | -2054.261729 | 0.762661 |             |             |        |
| <b>mNO4b</b> | D              | 0    | -2361.230028 | 1.79508  | 0.835074556 | 0.417479039 | 34.571 |
|              | Q              |      | -2361.230032 | 3.795359 |             |             |        |
|              | D <sub>0</sub> | 1.1  | -2361.283499 | 0.762665 |             |             |        |
| <b>pNN0a</b> | D              | 54.1 | -1302.938853 | 1.826672 | 437.0494871 | 217.0771645 | 5.783  |
|              | Q              |      | -1302.940844 | 3.840009 |             |             |        |

|              |                |      |              |          |              |             |        |
|--------------|----------------|------|--------------|----------|--------------|-------------|--------|
|              | D <sub>0</sub> | 74.3 | -1303.003879 | 0.814829 |              |             |        |
| <b>pNN1a</b> | D              | 56.2 | --           | --       | --           | --          | 12.678 |
|              | Q              |      | -1609.961874 | 3.843416 |              |             |        |
|              | D <sub>0</sub> | 70.0 | -1610.025397 | 0.818019 |              |             |        |
| <b>pNN2a</b> | D              | 57.4 | --           | --       | --           | --          | 19.565 |
|              | Q              |      | -1916.983637 | 3.842294 |              |             |        |
|              | D <sub>0</sub> | 73.1 | -1917.047332 | 0.819551 |              |             |        |
| <b>pNN3a</b> | D              | 58.1 | --           | --       | --           | --          | 26.445 |
|              | Q              |      | -2224.005412 | 3.841382 |              |             |        |
|              | D <sub>0</sub> | 73.4 | -2224.069189 | 0.819706 |              |             |        |
| <b>pNN4a</b> | D              | 58.0 | --           | --       | --           | --          | 33.331 |
|              | Q              |      | -2531.027133 | 3.840738 |              |             |        |
|              | D <sub>0</sub> | 76.8 | -2531.089148 | 0.815233 |              |             |        |
| <b>pNN5a</b> | D              | 58.6 | -2838.048885 | 1.840922 | 0.079315924  | 0.039657407 | 40.202 |
|              | Q              |      | -2838.048885 | 3.84095  |              |             |        |
|              | D <sub>0</sub> | 75.4 | -2838.111366 | 0.815719 |              |             |        |
| <b>pNN0b</b> | D              | 0.3  | --           | --       | --           | --          | 8.303  |
|              | Q              |      | -1379.069728 | 3.850312 |              |             |        |
|              | D <sub>0</sub> | 7.4  | -1379.120945 | 0.816896 |              |             |        |
| <b>pNN1b</b> | D              | 0.0  | --           | --       | --           | --          | 15.205 |
|              | Q              |      | -1686.090205 | 3.858818 |              |             |        |
|              | D <sub>0</sub> | 6.5  | -1686.141844 | 0.814845 |              |             |        |
| <b>pNN2b</b> | D              | 0.1  | --           | --       | --           | --          | 22.102 |
|              | Q              |      | -1993.109919 | 3.850688 |              |             |        |
|              | D <sub>0</sub> | 0.4  | -1993.163329 | 0.815512 |              |             |        |
| <b>pNN3b</b> | D              | 1.3  | --           | --       | --           | --          | 28.992 |
|              | Q              |      | -2300.131778 | 3.848982 |              |             |        |
|              | D <sub>0</sub> | 10.1 | -2300.186503 | 0.818515 |              |             |        |
| <b>pNN4b</b> | D              | 0.2  | -2607.153395 | 1.847943 | 1.122700313  | 0.561249973 | 35.882 |
|              | Q              |      | -2607.153401 | 3.8483   |              |             |        |
|              | D <sub>0</sub> | 2.2  | -2607.208244 | 0.819711 |              |             |        |
| <b>mNN0a</b> | D              | 62.8 | -1302.938506 | 1.823837 | -60.95761282 | -30.3935828 | 5.009  |
|              | Q              |      | -1302.938228 | 3.829445 |              |             |        |
|              | D <sub>0</sub> | 72.8 | -1303.002737 | 0.81324  |              |             |        |

|              |                |      |              |          |              |              |        |
|--------------|----------------|------|--------------|----------|--------------|--------------|--------|
| <b>mNN1a</b> | D              | 58.9 | -1609.960162 | 1.836946 | -15.89319387 | -7.960691339 | 11.445 |
|              | Q              |      | -1609.96009  | 3.833405 |              |              |        |
|              | D <sub>0</sub> | 72.3 | -1610.022232 | 0.811169 |              |              |        |
| <b>mNN2a</b> | D              | 57.7 | -1916.982001 | 1.83657  | -3.411491227 | -1.706618549 | 18.301 |
|              | Q              |      | -1916.981985 | 3.835547 |              |              |        |
|              | D <sub>0</sub> | 73.9 | -1917.045866 | 0.814719 |              |              |        |
| <b>mNN3a</b> | D              | 58.1 | -2224.003782 | 1.835912 | -0.661250714 | -0.330667517 | 24.932 |
|              | Q              |      | -2224.003779 | 3.835657 |              |              |        |
|              | D <sub>0</sub> | 73.4 | -2224.067625 | 0.814791 |              |              |        |
| <b>mNN4a</b> | D              | 57.5 | -2531.025446 | 1.834732 | -0.116911955 | -0.058457643 | 31.932 |
|              | Q              |      | -2531.025446 | 3.834675 |              |              |        |
|              | D <sub>0</sub> | 71.8 | -2531.089361 | 0.81462  |              |              |        |
| <b>mNN5a</b> | D              | 56.9 | -2838.047295 | 1.836288 | -0.033224051 | -0.016612142 | 38.837 |
|              | Q              |      | -2838.047295 | 3.836274 |              |              |        |
|              | D <sub>0</sub> | 70.5 | -2838.110984 | 0.814091 |              |              |        |
| <b>mNN0b</b> | D              | 2.9  | -1379.065335 | 1.855262 | -192.1893421 | -97.4224909  | 7.316  |
|              | Q              |      | -1379.064459 | 3.828003 |              |              |        |
|              | D <sub>0</sub> | 7.8  | -1379.11993  | 0.814483 |              |              |        |
| <b>mNN1b</b> | D              | 0.7  | -1686.086564 | 1.84709  | -41.41971178 | -20.79754875 | 13.952 |
|              | Q              |      | -1686.086375 | 3.838657 |              |              |        |
|              | D <sub>0</sub> | 0.8  | -1686.141673 | 0.814346 |              |              |        |
| <b>mNN2b</b> | D              | 0.0  | -1993.109938 | 1.847992 | -8.962124562 | -4.486636928 | 20.792 |
|              | Q              |      | -1993.109897 | 3.845507 |              |              |        |
|              | D <sub>0</sub> | 0.1  | -1993.163436 | 0.814274 |              |              |        |
| <b>mNN3b</b> | D              | 0.1  | -2300.131726 | 1.847165 | -1.707975493 | -0.854244447 | 27.629 |
|              | Q              |      | -2300.131718 | 3.846564 |              |              |        |
|              | D <sub>0</sub> | 0.5  | -2300.185218 | 0.8143   |              |              |        |
| <b>mNN4b</b> | D              | 0.0  | -2607.153496 | 1.847024 | -0.320909192 | -0.160465508 | 34.463 |
|              | Q              |      | -2607.153494 | 3.846888 |              |              |        |
|              | D <sub>0</sub> | 0.5  | -2607.206988 | 0.814303 |              |              |        |
| <b>pTZ0a</b> | D              | 58.2 | -1713.174126 | 1.786161 | 163.3562924  | 81.35974484  | 5.791  |
|              | Q              |      | -1713.17487  | 3.793988 |              |              |        |
|              | D <sub>0</sub> | 75.6 | -1713.238597 | 0.769621 |              |              |        |
| <b>pTZ1a</b> | D              | 57.4 | -2020.196136 | 1.789929 | 34.20102544  | 17.06572424  | 12.683 |

|              |                |      |              |          |              |              |        |
|--------------|----------------|------|--------------|----------|--------------|--------------|--------|
|              | Q              |      | -2020.196292 | 3.794006 |              |              |        |
|              | D <sub>0</sub> | 74.9 | -2020.260019 | 0.770494 |              |              |        |
| <b>pTZ2a</b> | D              | 57.2 | -2327.217943 | 1.79153  | 6.699664084  | 3.347674466  | 19.573 |
|              | Q              |      | -2327.217973 | 3.792819 |              |              |        |
|              | D <sub>0</sub> | 74.6 | -2327.28174  | 0.770541 |              |              |        |
| <b>pTZ3a</b> | D              | 57.5 | -2634.239725 | 1.792003 | 1.263100492  | 0.631450793  | 26.464 |
|              | Q              |      | -2634.239731 | 3.792318 |              |              |        |
|              | D <sub>0</sub> | 75.8 | -2634.303481 | 0.770563 |              |              |        |
| <b>pTZ4a</b> | D              | 58   | -2941.261504 | 1.792053 | 0.230871963  | 0.115431595  | 33.351 |
|              | Q              |      | -2941.261505 | 3.792129 |              |              |        |
|              | D <sub>0</sub> | 73.3 | -2941.325169 | 0.770564 |              |              |        |
| <b>pTZ5a</b> | D              | 58.2 | -3248.283271 | 1.792068 | 0.051477777  | 0.025738657  | 40.241 |
|              | Q              |      | -3248.283272 | 3.792086 |              |              |        |
|              | D <sub>0</sub> | 73.2 | -3248.347003 | 0.770543 |              |              |        |
| <b>pTZ0b</b> | D              | 0.2  | -1789.300639 | 1.788762 | 428.6143671  | 212.4126749  | 8.319  |
|              | Q              |      | -1789.302592 | 3.8066   |              |              |        |
|              | D <sub>0</sub> | 0.3  | -1789.3559   | 0.770814 |              |              |        |
| <b>pTZ1b</b> | D              | 0.7  | -2096.323875 | 1.798066 | 86.76361195  | 43.18638757  | 15.209 |
|              | Q              |      | -2096.32427  | 3.807116 |              |              |        |
|              | D <sub>0</sub> | 0.6  | -2096.377649 | 0.770579 |              |              |        |
| <b>pTZ2b</b> | D              | 0.3  | -2403.345888 | 1.801624 | 16.54235804  | 8.259025863  | 22.098 |
|              | Q              |      | -2403.345963 | 3.804567 |              |              |        |
|              | D <sub>0</sub> | 0.8  | -2403.399418 | 0.770559 |              |              |        |
| <b>pTZ3b</b> | D              | 0.2  | -2710.367703 | 1.802715 | 3.095752907  | 1.54726451   | 28.987 |
|              | Q              |      | -2710.367717 | 3.803506 |              |              |        |
|              | D <sub>0</sub> | 0.9  | -2710.42119  | 0.770549 |              |              |        |
| <b>pTZ4b</b> | D              | 0.3  | -3017.389483 | 1.803033 | 0.572813266  | 0.286381432  | 35.873 |
|              | Q              |      | -3017.389485 | 3.803209 |              |              |        |
|              | D <sub>0</sub> | 0.8  | -3017.442965 | 0.770553 |              |              |        |
| <b>mTZ0a</b> | D              | 64.2 | -1713.173821 | 1.767564 | -69.09834935 | -34.20024666 | 5.011  |
|              | Q              |      | -1713.173506 | 3.787969 |              |              |        |
|              | D <sub>0</sub> | 71.4 | -1713.238022 | 0.769481 |              |              |        |
| <b>mTZ1a</b> | D              | 59.5 | -2020.195161 | 1.788271 | -15.88485607 | -7.936499469 | 11.516 |
|              | Q              |      | -2020.195088 | 3.789765 |              |              |        |

|              |                |      |              |          |              |              |        |
|--------------|----------------|------|--------------|----------|--------------|--------------|--------|
|              | D <sub>0</sub> | 74.9 | -2020.259039 | 0.769462 |              |              |        |
| <b>mTZ2a</b> | D              | 58   | -2327.216934 | 1.790859 | -3.148837153 | -1.574553988 | 18.257 |
|              | Q              |      | -2327.21692  | 3.790687 |              |              |        |
|              | D <sub>0</sub> | 74.6 | -2327.280708 | 0.76947  |              |              |        |
| <b>mTZ3a</b> | D              | 58.1 | -2634.238706 | 1.790973 | -0.59270001  | -0.296363489 | 25.029 |
|              | Q              |      | -2634.238703 | 3.790882 |              |              |        |
|              | D <sub>0</sub> | 75.8 | -2634.302395 | 0.76944  |              |              |        |
| <b>mTZ4a</b> | D              | 58.1 | -2941.260424 | 1.790967 | -0.116997488 | -0.058499534 | 31.734 |
|              | Q              |      | -2941.260423 | 3.79094  |              |              |        |
|              | D <sub>0</sub> | 73.3 | -2941.324155 | 0.769444 |              |              |        |
| <b>mTZ5a</b> | D              | 58.2 | -3248.28226  | 1.79095  | -0.027570469 | -0.013785283 | 38.732 |
|              | Q              |      | -3248.28226  | 3.790943 |              |              |        |
|              | D <sub>0</sub> | 73.2 | -3248.34593  | 0.769447 |              |              |        |
| <b>mTZ0b</b> | D              | 1.8  | -1789.30028  | 1.773037 | -191.318186  | -94.80180034 | 7.295  |
|              | Q              |      | -1789.299409 | 3.791123 |              |              |        |
|              | D <sub>0</sub> | 3.8  | -1789.354768 | 0.769485 |              |              |        |
| <b>mTZ1b</b> | D              | 1.9  | -2096.322971 | 1.799955 | -37.84949648 | -18.93355234 | 13.998 |
|              | Q              |      | -2096.322799 | 3.799025 |              |              |        |
|              | D <sub>0</sub> | 9.6  | -2096.376549 | 0.769428 |              |              |        |
| <b>mTZ2b</b> | D              | 0.8  | -2403.344858 | 1.802189 | -7.345430774 | -3.674431347 | 20.905 |
|              | Q              |      | -2403.344824 | 3.801255 |              |              |        |
|              | D <sub>0</sub> | 3.6  | -2403.398319 | 0.76945  |              |              |        |
| <b>mTZ3b</b> | D              | 0.3  | -2710.366661 | 1.802125 | -1.349494423 | -0.674851138 | 27.551 |
|              | Q              |      | -2710.366655 | 3.801817 |              |              |        |
|              | D <sub>0</sub> | 2.0  | -2710.420138 | 0.769437 |              |              |        |
| <b>mTZ4b</b> | D              | 1.2  | -3017.38819  | 1.802045 | -0.244262067 | -0.122135858 | 34.064 |
|              | Q              |      | -3017.388189 | 3.801966 |              |              |        |
|              | D <sub>0</sub> | 13   | -3017.441505 | 0.769448 |              |              |        |

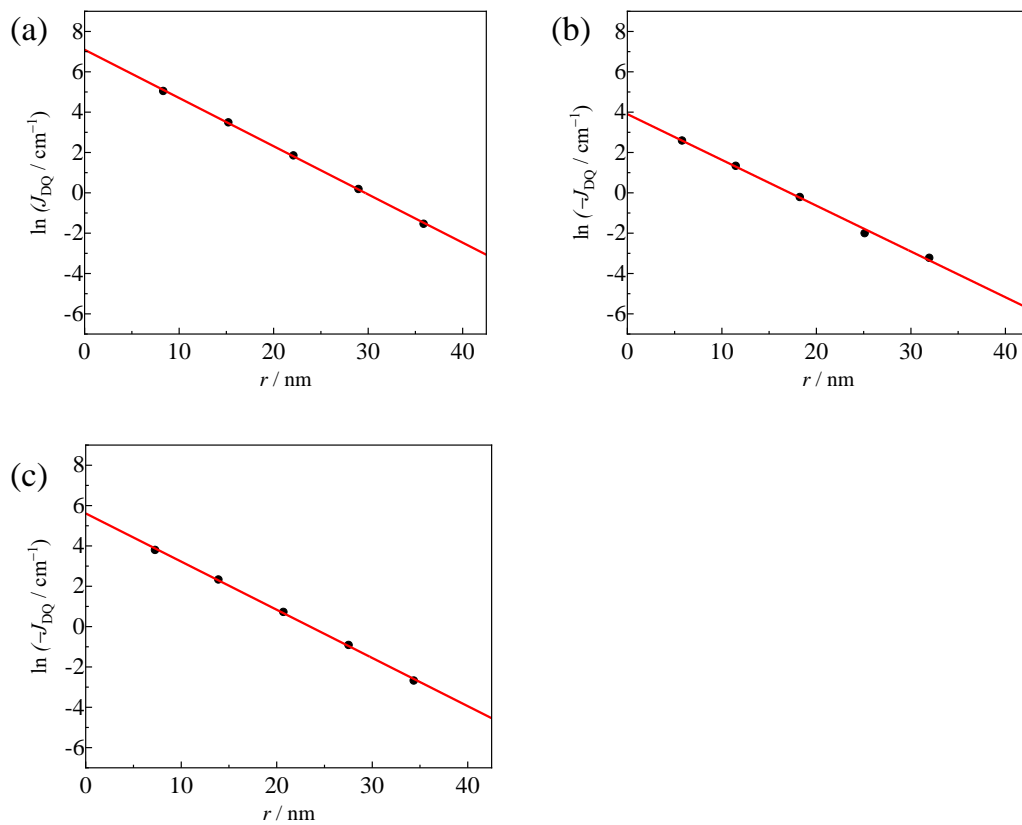

**Fig. S2.** Linker length dependence of  $J_{DQ}$ ; (a) *pINnb*, (b) *mINna* and (c) *mINnb* series. The red lines are least-square fit using Eqn. 3.

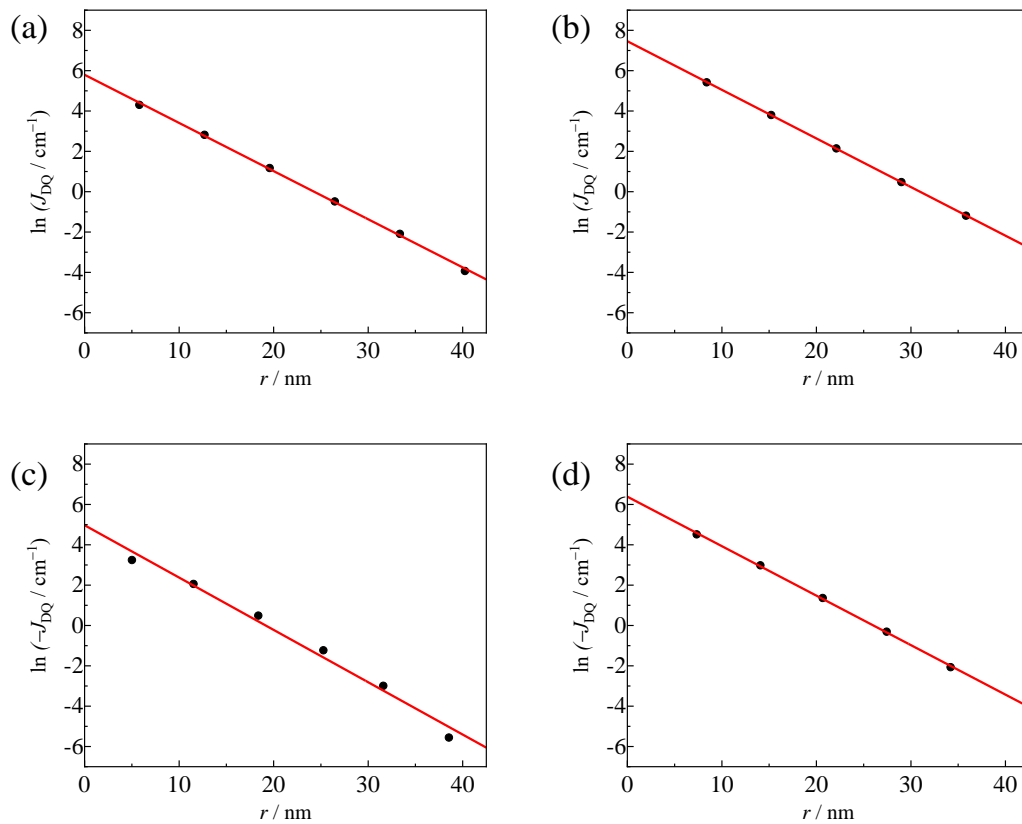

**Fig. S3.** Linker length dependence of  $J_{DQ}$ ; (a) *pOVna*, (b) *pOVnb*, (c) *mOVna*, and (d) *mOVnb* series. The red lines are least-square fit using Eqn. 3.



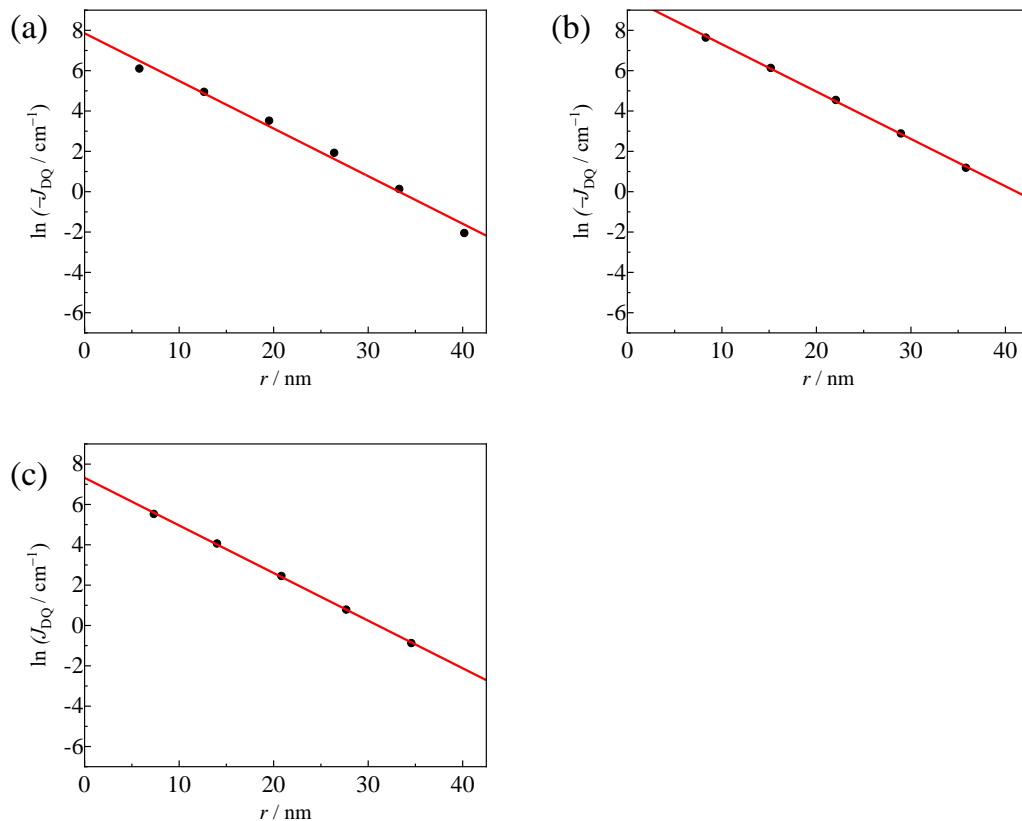

**Fig. S4.** Linker length dependence of  $J_{DQ}$ ; (a)  $pNOna$ , (b)  $pNONb$ , and (c)  $mNONb$  series. The red lines are least-square fit using Eqn. 3.

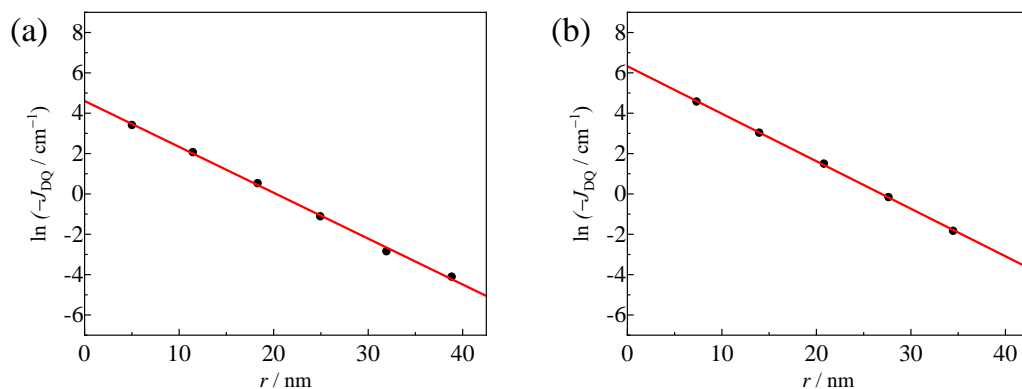

**Fig. S5.** Linker length dependence of  $J_{DQ}$ ; (a)  $mNNna$  and (d)  $mNNnb$  series. The red lines are least-square fit using Eqn. 3.

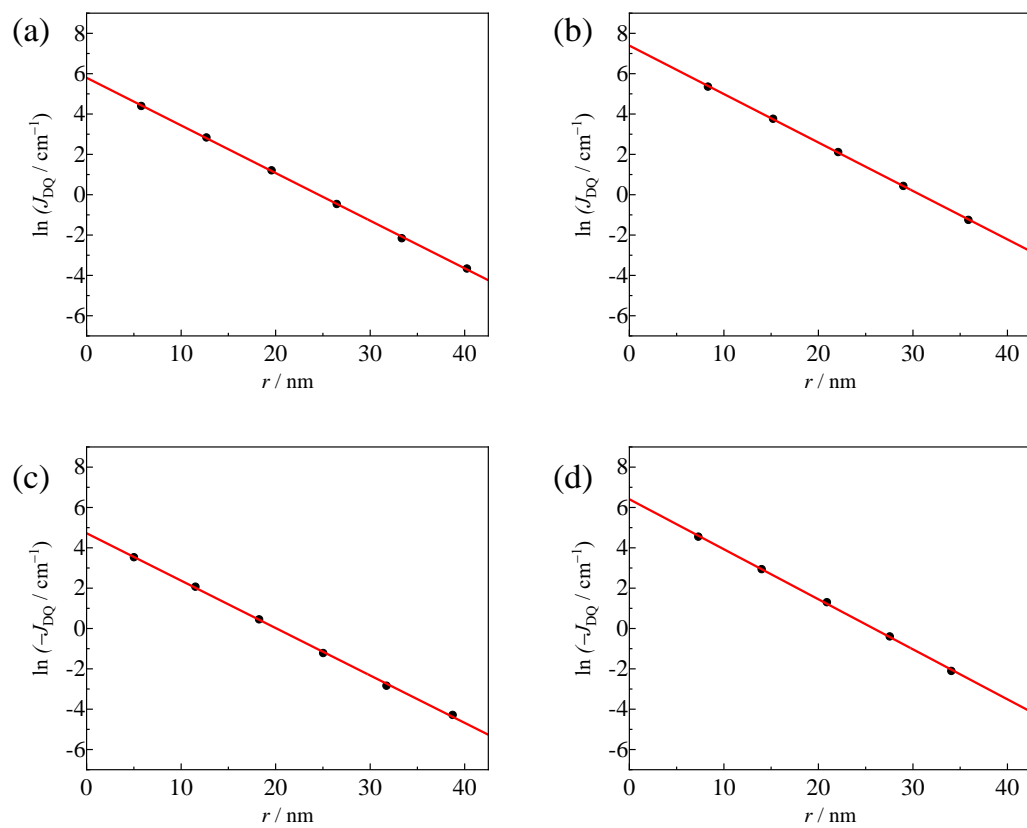

**Fig. S6.** Linker length dependence of  $J_{DQ}$ ; (a)  $p\text{TZna}$ , (b)  $p\text{TZnb}$ , (c)  $m\text{TZna}$  and (d)  $m\text{TZnb}$  series. The red lines are least-square fit using Eqn. 3.

**Table S4.** Calculated decay constant ( $\beta$ ) and  $J_0^{Ex}$  values of Q states for anthracene-radical linked  $\pi$ -conjugated spin systems

|              | $\beta/$ | $J_0^{Ex}/ \text{cm}^{-1}$ |
|--------------|----------|----------------------------|
| <i>pINna</i> | --       | --                         |
| <i>pINnb</i> | -0.239   | 1205                       |
| <i>mINna</i> | -0.227   | -50                        |
| <i>mINnb</i> | -0.239   | -274                       |
| <i>pOVna</i> | -0.239   | 329                        |
| <i>pOVnb</i> | -0.241   | 1737                       |
| <i>mOVna</i> | -0.259   | -144                       |
| <i>mOVnb</i> | -0.245   | -593                       |
| <i>pNOna</i> | -0.236   | -2574                      |
| <i>pNOnb</i> | -0.235   | -15634                     |
| <i>mNOna</i> | --       | --                         |
| <i>mNOnb</i> | -0.236   | 1512                       |
| <i>pNNna</i> | --       | --                         |
| <i>pNNnb</i> | --       | --                         |
| <i>mNNna</i> | -0.227   | -100                       |
| <i>mNNnb</i> | -0.236   | -562                       |
| <i>pTZna</i> | -0.236   | 329                        |
| <i>pTZnb</i> | -0.240   | 1623                       |
| <i>mTZna</i> | -0.235   | -113                       |
| <i>mTZnb</i> | -0.248   | -607                       |

**Table. S5** Experimental and calculated  $g$  values for Q states of anthracene-radical linked  $\pi$ -conjugated spin systems

|                     | Experiment                   | Calculation by eq.3 |
|---------------------|------------------------------|---------------------|
| <b><i>pIN0a</i></b> | 2.0043 (S= 3/2) <sup>1</sup> | 2.00413             |
| <b><i>pOV0a</i></b> | 2.0035 (S= 3/2) <sup>2</sup> | 2.00303             |
| <b><i>pNO0a</i></b> | 2.0048 (S= 3/2) <sup>3</sup> | 2.00387             |
| <b><i>pNN0a</i></b> |                              | 2.00402             |
| <b><i>pTZ0a</i></b> |                              | 2.00526             |

**Table. S6** Referenced  $g$  values used in the calculation of Eqn 3.

|                          | Experiment                    |
|--------------------------|-------------------------------|
| <b>phenyl-<i>pOV</i></b> | 2.0036 (S= 1/2) <sup>4</sup>  |
| <b>phenyl-<i>pIN</i></b> | 2.0068 (S= 1/2) <sup>5</sup>  |
| <b>phenyl-<i>pNO</i></b> | 2.0060 (S= 1/2) <sup>6</sup>  |
| <b>phenyl-<i>pNN</i></b> | 2.00645 (S= 1/2) <sup>7</sup> |
| <b>phenyl-<i>pTZ</i></b> | 2.01019 (S= 1/2) <sup>8</sup> |
| <b>Anthracene</b>        | 2.0028 (S = 1) <sup>9</sup>   |

**Table. S7** Details of the calculated  $g$  values of Q states by UB3LYP/6-31G (d,p).

| Sample              |                  | $g_{xx}$   | $g_{yy}$   | $g_{zz}$   | $g_{iso}$ |
|---------------------|------------------|------------|------------|------------|-----------|
| <b><i>pIN0a</i></b> | $g_e$            | 2.0023193  | 2.0023193  | 2.0023193  |           |
|                     | $\Delta g_{RMC}$ | -0.0002005 | -0.0002005 | -0.0002005 |           |
|                     | $\Delta g_{DSO}$ | 0.0000627  | 0.0001053  | 0.0000859  |           |
|                     | $\Delta g_{PSO}$ | 0.0001926  | 0.001451   | 0.0023748  |           |
|                     | $g_{total}$      | 2.002374   | 2.0036751  | 2.0045794  | 2.0035429 |
| <b><i>pIN1a</i></b> | $g_e$            | 2.0023193  | 2.0023193  | 2.0023193  |           |
|                     | $\Delta g_{RMC}$ | -0.0002002 | -0.0002002 | -0.0002002 |           |
|                     | $\Delta g_{DSO}$ | 0.0000671  | 0.0001055  | 0.0000809  |           |
|                     | $\Delta g_{PSO}$ | 0.0002451  | 0.0014419  | 0.0023908  |           |
|                     | $g_{total}$      | 2.0024312  | 2.0036664  | 2.0045908  | 2.0035628 |
| <b><i>pIN2a</i></b> | $g_e$            | 2.0023193  | 2.0023193  | 2.0023193  |           |
|                     | $\Delta g_{RMC}$ | -0.0002001 | -0.0002001 | -0.0002001 |           |
|                     | $\Delta g_{DSO}$ | 0.0000716  | 0.0001046  | 0.0000771  |           |
|                     | $\Delta g_{PSO}$ | 0.000282   | 0.0014357  | 0.0024914  |           |
|                     | $g_{total}$      | 2.0024727  | 2.0036595  | 2.0046876  | 2.0036066 |
| <b><i>pIN3a</i></b> | $g_e$            | 2.0023193  | 2.0023193  | 2.0023193  |           |
|                     | $\Delta g_{RMC}$ | -0.0002001 | -0.0002001 | -0.0002001 |           |
|                     | $\Delta g_{DSO}$ | 0.0000715  | 0.0001046  | 0.0000773  |           |
|                     | $\Delta g_{PSO}$ | 0.0002608  | 0.001434   | 0.0024464  |           |
|                     | $g_{total}$      | 2.0024514  | 2.0036577  | 2.0046428  | 2.003584  |
| <b><i>pIN4a</i></b> | $g_e$            | 2.0023193  | 2.0023193  | 2.0023193  |           |
|                     | $\Delta g_{RMC}$ | -0.0002001 | -0.0002001 | -0.0002001 |           |
|                     | $\Delta g_{DSO}$ | 0.0000716  | 0.0001044  | 0.0000774  |           |
|                     | $\Delta g_{PSO}$ | 0.0002406  | 0.0014322  | 0.0023989  |           |
|                     | $g_{total}$      | 2.0024313  | 2.0036558  | 2.0045954  | 2.0035608 |
| <b><i>pIN5a</i></b> | $g_e$            | 2.0023193  | 2.0023193  | 2.0023193  |           |
|                     | $\Delta g_{RMC}$ | -0.0002001 | -0.0002001 | -0.0002001 |           |
|                     | $\Delta g_{DSO}$ | 0.0000594  | 0.0001056  | 0.0000884  |           |
|                     | $\Delta g_{PSO}$ | 0.0001188  | 0.0014374  | 0.0024462  |           |
|                     | $g_{total}$      | 2.0022974  | 2.0036621  | 2.0046538  | 2.0035377 |
| <b><i>pIN0b</i></b> | $g_e$            | 2.0023193  | 2.0023193  | 2.0023193  |           |
|                     | $\Delta g_{RMC}$ | -0.0002006 | -0.0002006 | -0.0002006 |           |

|                     |                         |            |            |            |           |
|---------------------|-------------------------|------------|------------|------------|-----------|
|                     | $\Delta g_{\text{DSO}}$ | 0.00004    | 0.0001069  | 0.0001074  |           |
|                     | $\Delta g_{\text{PSO}}$ | -0.0000247 | 0.0015414  | 0.0025922  |           |
|                     | $g_{\text{total}}$      | 2.002134   | 2.003767   | 2.0048182  | 2.0035731 |
| <b><i>pIN1b</i></b> | $g_e$                   | 2.0023193  | 2.0023193  | 2.0023193  |           |
|                     | $\Delta g_{\text{RMC}}$ | -0.0001998 | -0.0001998 | -0.0001998 |           |
|                     | $\Delta g_{\text{DSO}}$ | 0.0000402  | 0.0001066  | 0.0001066  |           |
|                     | $\Delta g_{\text{PSO}}$ | -0.0000211 | 0.0015099  | 0.0026025  |           |
|                     | $g_{\text{total}}$      | 2.0021385  | 2.0037359  | 2.0048286  | 2.0035677 |
| <b><i>pIN2b</i></b> | $g_e$                   | 2.0023193  | 2.0023193  | 2.0023193  |           |
|                     | $\Delta g_{\text{RMC}}$ | -0.0001997 | -0.0001997 | -0.0001997 |           |
|                     | $\Delta g_{\text{DSO}}$ | 0.0000402  | 0.0001066  | 0.0001064  |           |
|                     | $\Delta g_{\text{PSO}}$ | 0.000062   | 0.0015041  | 0.0026424  |           |
|                     | $g_{\text{total}}$      | 2.0022219  | 2.0037303  | 2.0048684  | 2.0036069 |
| <b><i>pIN3b</i></b> | $g_e$                   | 2.0023193  | 2.0023193  | 2.0023193  |           |
|                     | $\Delta g_{\text{RMC}}$ | -0.0001996 | -0.0001996 | -0.0001996 |           |
|                     | $\Delta g_{\text{DSO}}$ | 0.0000402  | 0.0001065  | 0.0001065  |           |
|                     | $\Delta g_{\text{PSO}}$ | 0.0000115  | 0.0015019  | 0.0026421  |           |
|                     | $g_{\text{total}}$      | 2.0021713  | 2.0037281  | 2.0048683  | 2.0035892 |
| <b><i>pIN4b</i></b> | $g_e$                   | 2.0023193  | 2.0023193  | 2.0023193  |           |
|                     | $\Delta g_{\text{RMC}}$ | -0.0001996 | -0.0001996 | -0.0001996 |           |
|                     | $\Delta g_{\text{DSO}}$ | 0.0000408  | 0.0001063  | 0.0001061  |           |
|                     | $\Delta g_{\text{PSO}}$ | -0.0000488 | 0.0014981  | 0.0026317  |           |
|                     | $g_{\text{total}}$      | 2.0021117  | 2.003724   | 2.0048574  | 2.0035644 |
| <b><i>pOV0a</i></b> | $g_e$                   | 2.0023193  | 2.0023193  | 2.0023193  |           |
|                     | $\Delta g_{\text{RMC}}$ | -0.0001852 | -0.0001852 | -0.0001852 |           |
|                     | $\Delta g_{\text{DSO}}$ | 0.000056   | 0.0000822  | 0.0001003  |           |
|                     | $\Delta g_{\text{PSO}}$ | 0.0001551  | 0.0008677  | 0.0009794  |           |
|                     | $g_{\text{total}}$      | 2.0023452  | 2.0030839  | 2.0032138  | 2.0028809 |
| <b><i>pOV1a</i></b> | $g_e$                   | 2.0023193  | 2.0023193  | 2.0023193  |           |
|                     | $\Delta g_{\text{RMC}}$ | -0.0001848 | -0.0001848 | -0.0001848 |           |
|                     | $\Delta g_{\text{DSO}}$ | 0.00005    | 0.0000879  | 0.0001001  |           |
|                     | $\Delta g_{\text{PSO}}$ | 0.0000822  | 0.0009182  | 0.0009692  |           |
|                     | $g_{\text{total}}$      | 2.0022667  | 2.0031406  | 2.0032038  | 2.0028704 |
| <b><i>pOV2a</i></b> | $g_e$                   | 2.0023193  | 2.0023193  | 2.0023193  |           |
|                     | $\Delta g_{\text{RMC}}$ | -0.0001847 | -0.0001847 | -0.0001847 |           |

|                     |                         |            |            |            |           |
|---------------------|-------------------------|------------|------------|------------|-----------|
|                     | $\Delta g_{\text{DSO}}$ | 0.0000647  | 0.0000732  | 0.0001     |           |
|                     | $\Delta g_{\text{PSO}}$ | 0.0001928  | 0.0007852  | 0.000967   |           |
|                     | $g_{\text{total}}$      | 2.0023921  | 2.002993   | 2.0032016  | 2.0028622 |
| <b><i>pOV3a</i></b> | $g_e$                   | 2.0023193  | 2.0023193  | 2.0023193  |           |
|                     | $\Delta g_{\text{RMC}}$ | -0.0001847 | -0.0001847 | -0.0001847 |           |
|                     | $\Delta g_{\text{DSO}}$ | 0.0000653  | 0.0000725  | 0.0001     |           |
|                     | $\Delta g_{\text{PSO}}$ | 0.0001808  | 0.0007775  | 0.0009665  |           |
|                     | $g_{\text{total}}$      | 2.0023807  | 2.0029846  | 2.0032011  | 2.0028555 |
| <b><i>pOV4a</i></b> | $g_e$                   | 2.0023193  | 2.0023193  | 2.0023193  |           |
|                     | $\Delta g_{\text{RMC}}$ | -0.0001847 | -0.0001847 | -0.0001847 |           |
|                     | $\Delta g_{\text{DSO}}$ | 0.0000653  | 0.0000725  | 0.0001     |           |
|                     | $\Delta g_{\text{PSO}}$ | 0.0001639  | 0.0007742  | 0.0009662  |           |
|                     | $g_{\text{total}}$      | 2.0023638  | 2.0029814  | 2.0032009  | 2.0028487 |
| <b><i>pOV5a</i></b> | $g_e$                   | 2.0023193  | 2.0023193  | 2.0023193  |           |
|                     | $\Delta g_{\text{RMC}}$ | -0.0001847 | -0.0001847 | -0.0001847 |           |
|                     | $\Delta g_{\text{DSO}}$ | 0.0000652  | 0.0000726  | 0.0001     |           |
|                     | $\Delta g_{\text{PSO}}$ | 0.000146   | 0.0007715  | 0.0009663  |           |
|                     | $g_{\text{total}}$      | 2.0023458  | 2.0029787  | 2.0032009  | 2.0028418 |
| <b><i>pOV0b</i></b> | $g_e$                   | 2.0023193  | 2.0023193  | 2.0023193  |           |
|                     | $\Delta g_{\text{RMC}}$ | -0.0001858 | -0.0001858 | -0.0001858 |           |
|                     | $\Delta g_{\text{DSO}}$ | 0.0000359  | 0.0001016  | 0.0001019  |           |
|                     | $\Delta g_{\text{PSO}}$ | -0.0000736 | 0.0010644  | 0.0010918  |           |
|                     | $g_{\text{total}}$      | 2.0020958  | 2.0032995  | 2.0033271  | 2.0029075 |
| <b><i>pOV1b</i></b> | $g_e$                   | 2.0023193  | 2.0023193  | 2.0023193  |           |
|                     | $\Delta g_{\text{RMC}}$ | -0.0001845 | -0.0001845 | -0.0001845 |           |
|                     | $\Delta g_{\text{DSO}}$ | 0.0000362  | 0.0001011  | 0.0001007  |           |
|                     | $\Delta g_{\text{PSO}}$ | -0.0000333 | 0.0010366  | 0.0010639  |           |
|                     | $g_{\text{total}}$      | 2.0021377  | 2.0032724  | 2.0032994  | 2.0029032 |
| <b><i>pOV2b</i></b> | $g_e$                   | 2.0023193  | 2.0023193  | 2.0023193  |           |
|                     | $\Delta g_{\text{RMC}}$ | -0.0001842 | -0.0001842 | -0.0001842 |           |
|                     | $\Delta g_{\text{DSO}}$ | 0.0000364  | 0.0001009  | 0.0001004  |           |
|                     | $\Delta g_{\text{PSO}}$ | -0.0000601 | 0.0010301  | 0.0010561  |           |
|                     | $g_{\text{total}}$      | 2.0021114  | 2.0032661  | 2.0032915  | 2.0028897 |
| <b><i>pOV3b</i></b> | $g_e$                   | 2.0023193  | 2.0023193  | 2.0023193  |           |
|                     | $\Delta g_{\text{RMC}}$ | -0.0001842 | -0.0001842 | -0.0001842 |           |

|                     |                         |            |            |            |           |
|---------------------|-------------------------|------------|------------|------------|-----------|
|                     | $\Delta g_{\text{DSO}}$ | 0.0000363  | 0.0001009  | 0.0001004  |           |
|                     | $\Delta g_{\text{PSO}}$ | -0.0000889 | 0.0010288  | 0.0010539  |           |
|                     | $g_{\text{total}}$      | 2.0020825  | 2.0032648  | 2.0032894  | 2.0028789 |
| <b><i>pOV4b</i></b> | $g_e$                   | 2.0023193  | 2.0023193  | 2.0023193  |           |
|                     | $\Delta g_{\text{RMC}}$ | -0.0001842 | -0.0001842 | -0.0001842 |           |
|                     | $\Delta g_{\text{DSO}}$ | 0.0000364  | 0.0001009  | 0.0001003  |           |
|                     | $\Delta g_{\text{PSO}}$ | -0.0001242 | 0.0010282  | 0.0010499  |           |
|                     | $g_{\text{total}}$      | 2.0020473  | 2.0032642  | 2.0032853  | 2.0028656 |
| <b><i>mNO0a</i></b> | $g_e$                   | 2.0023193  | 2.0023193  | 2.0023193  |           |
|                     | $\Delta g_{\text{RMC}}$ | -0.0001942 | -0.0001942 | -0.0001942 |           |
|                     | $\Delta g_{\text{DSO}}$ | 0.0000617  | 0.0000811  | 0.0001043  |           |
|                     | $\Delta g_{\text{PSO}}$ | 0.0001778  | 0.0010545  | 0.0024926  |           |
|                     | $g_{\text{total}}$      | 2.0023645  | 2.0032607  | 2.004722   | 2.0034491 |
| <b><i>mNO1a</i></b> | $g_e$                   | 2.0023193  | 2.0023193  | 2.0023193  |           |
|                     | $\Delta g_{\text{RMC}}$ | -0.0001944 | -0.0001944 | -0.0001944 |           |
|                     | $\Delta g_{\text{DSO}}$ | 0.000061   | 0.0000823  | 0.0001045  |           |
|                     | $\Delta g_{\text{PSO}}$ | 0.0002933  | 0.0012343  | 0.0025335  |           |
|                     | $g_{\text{total}}$      | 2.0024791  | 2.0034414  | 2.0047629  | 2.0035611 |
| <b><i>mNO2a</i></b> | $g_e$                   | 2.0023193  | 2.0023193  | 2.0023193  |           |
|                     | $\Delta g_{\text{RMC}}$ | -0.0001945 | -0.0001945 | -0.0001945 |           |
|                     | $\Delta g_{\text{DSO}}$ | 0.0000595  | 0.0000838  | 0.0001045  |           |
|                     | $\Delta g_{\text{PSO}}$ | 0.0002541  | 0.0012064  | 0.0025349  |           |
|                     | $g_{\text{total}}$      | 2.0024384  | 2.003415   | 2.0047642  | 2.0035392 |
| <b><i>mNO3a</i></b> | $g_e$                   | 2.0023193  | 2.0023193  | 2.0023193  |           |
|                     | $\Delta g_{\text{RMC}}$ | -0.0001945 | -0.0001945 | -0.0001945 |           |
|                     | $\Delta g_{\text{DSO}}$ | 0.0000576  | 0.0000856  | 0.0001045  |           |
|                     | $\Delta g_{\text{PSO}}$ | 0.0002111  | 0.0011852  | 0.0025357  |           |
|                     | $g_{\text{total}}$      | 2.0023936  | 2.0033956  | 2.004765   | 2.003518  |
| <b><i>mNO4a</i></b> | $g_e$                   | 2.0023193  | 2.0023193  | 2.0023193  |           |
|                     | $\Delta g_{\text{RMC}}$ | -0.0001945 | -0.0001945 | -0.0001945 |           |
|                     | $\Delta g_{\text{DSO}}$ | 0.0000636  | 0.0000799  | 0.0001042  |           |
|                     | $\Delta g_{\text{PSO}}$ | 0.0002131  | 0.001112   | 0.0025384  |           |
|                     | $g_{\text{total}}$      | 2.0024015  | 2.0033168  | 2.0047674  | 2.0034952 |
| <b><i>mNO5a</i></b> | $g_e$                   | 2.0023193  | 2.0023193  | 2.0023193  |           |
|                     | $\Delta g_{\text{RMC}}$ | -0.0001945 | -0.0001945 | -0.0001945 |           |



|                     |                         |            |            |            |           |
|---------------------|-------------------------|------------|------------|------------|-----------|
|                     | $\Delta g_{\text{DSO}}$ | 0.0000713  | 0.000072   | 0.0001046  |           |
|                     | $\Delta g_{\text{PSO}}$ | 0.000247   | 0.0010151  | 0.0025405  |           |
|                     | $g_{\text{total}}$      | 2.002443   | 2.0032118  | 2.0047699  | 2.0034749 |
| <b><i>mNO0b</i></b> | $g_e$                   | 2.0023193  | 2.0023193  | 2.0023193  |           |
|                     | $\Delta g_{\text{RMC}}$ | -0.0001934 | -0.0001934 | -0.0001934 |           |
|                     | $\Delta g_{\text{DSO}}$ | 0.0000391  | 0.0001039  | 0.0001045  |           |
|                     | $\Delta g_{\text{PSO}}$ | 0.0001734  | 0.0013193  | 0.0025685  |           |
|                     | $g_{\text{total}}$      | 2.0023384  | 2.0035491  | 2.0047988  | 2.0035621 |
| <b><i>mNO1b</i></b> | $g_e$                   | 2.0023193  | 2.0023193  | 2.0023193  |           |
|                     | $\Delta g_{\text{RMC}}$ | -0.000194  | -0.000194  | -0.000194  |           |
|                     | $\Delta g_{\text{DSO}}$ | 0.0000395  | 0.0001036  | 0.0001046  |           |
|                     | $\Delta g_{\text{PSO}}$ | 0.0001196  | 0.0013213  | 0.0025914  |           |
|                     | $g_{\text{total}}$      | 2.0022844  | 2.0035502  | 2.0048213  | 2.003552  |
| <b><i>mNO2b</i></b> | $g_e$                   | 2.0023193  | 2.0023193  | 2.0023193  |           |
|                     | $\Delta g_{\text{RMC}}$ | -0.0001941 | -0.0001941 | -0.0001941 |           |
|                     | $\Delta g_{\text{DSO}}$ | 0.0000396  | 0.0001036  | 0.0001046  |           |
|                     | $\Delta g_{\text{PSO}}$ | 0.0000711  | 0.0013209  | 0.0025928  |           |
|                     | $g_{\text{total}}$      | 2.0022359  | 2.0035496  | 2.0048225  | 2.003536  |
| <b><i>mNO3b</i></b> | $g_e$                   | 2.0023193  | 2.0023193  | 2.0023193  |           |
|                     | $\Delta g_{\text{RMC}}$ | -0.0001942 | -0.0001942 | -0.0001942 |           |
|                     | $\Delta g_{\text{DSO}}$ | 0.0000398  | 0.0001036  | 0.0001044  |           |
|                     | $\Delta g_{\text{PSO}}$ | 0.0000247  | 0.0013215  | 0.0025926  |           |
|                     | $g_{\text{total}}$      | 2.0021896  | 2.0035503  | 2.0048221  | 2.0035206 |
| <b><i>mNO4b</i></b> | $g_e$                   | 2.0023193  | 2.0023193  | 2.0023193  |           |
|                     | $\Delta g_{\text{RMC}}$ | -0.0001941 | -0.0001941 | -0.0001941 |           |
|                     | $\Delta g_{\text{DSO}}$ | 0.00004    | 0.0001036  | 0.0001041  |           |
|                     | $\Delta g_{\text{PSO}}$ | -0.0000215 | 0.0013214  | 0.0025865  |           |
|                     | $g_{\text{total}}$      | 2.0021436  | 2.0035501  | 2.0048158  | 2.0035032 |
| <b><i>pNN0a</i></b> | $g_e$                   | 2.0023193  | 2.0023193  | 2.0023193  |           |
|                     | $\Delta g_{\text{RMC}}$ | -0.0002169 | -0.0002169 | -0.0002169 |           |
|                     | $\Delta g_{\text{DSO}}$ | 0.0000593  | 0.0001118  | 0.0000989  |           |
|                     | $\Delta g_{\text{PSO}}$ | 0.0001098  | 0.001766   | 0.0032592  |           |
|                     | $g_{\text{total}}$      | 2.0022714  | 2.0039802  | 2.0054605  | 2.003904  |
| <b><i>pNN1a</i></b> | $g_e$                   | 2.0023193  | 2.0023193  | 2.0023193  |           |

|                     |                         |            |            |            |           |
|---------------------|-------------------------|------------|------------|------------|-----------|
|                     | $\Delta g_{\text{RMC}}$ | -0.0002156 | -0.0002156 | -0.0002156 |           |
|                     | $\Delta g_{\text{DSO}}$ | 0.0000583  | 0.000111   | 0.0000993  |           |
|                     | $\Delta g_{\text{PSO}}$ | 0.0001648  | 0.0017409  | 0.0033762  |           |
|                     | $g_{\text{total}}$      | 2.0023268  | 2.0039556  | 2.0055791  | 2.0039538 |
| <b><i>pNN2a</i></b> | $g_e$                   | 2.0023193  | 2.0023193  | 2.0023193  |           |
|                     | $\Delta g_{\text{RMC}}$ | -0.0002156 | -0.0002156 | -0.0002156 |           |
|                     | $\Delta g_{\text{DSO}}$ | 0.0000709  | 0.0001107  | 0.0000869  |           |
|                     | $\Delta g_{\text{PSO}}$ | 0.0001804  | 0.0017345  | 0.0032939  |           |
|                     | $g_{\text{total}}$      | 2.002355   | 2.0039489  | 2.0054845  | 2.0039295 |
| <b><i>pNN3a</i></b> | $g_e$                   | 2.0023193  | 2.0023193  | 2.0023193  |           |
|                     | $\Delta g_{\text{RMC}}$ | -0.0002155 | -0.0002155 | -0.0002155 |           |
|                     | $\Delta g_{\text{DSO}}$ | 0.0000732  | 0.0001104  | 0.0000848  |           |
|                     | $\Delta g_{\text{PSO}}$ | 0.0001619  | 0.0017323  | 0.0032444  |           |
|                     | $g_{\text{total}}$      | 2.0023389  | 2.0039464  | 2.0054329  | 2.0039061 |
| <b><i>pNN4a</i></b> | $g_e$                   | 2.0023193  | 2.0023193  | 2.0023193  |           |
|                     | $\Delta g_{\text{RMC}}$ | -0.0002155 | -0.0002155 | -0.0002155 |           |
|                     | $\Delta g_{\text{DSO}}$ | 0.0000553  | 0.0001109  | 0.000102   |           |
|                     | $\Delta g_{\text{PSO}}$ | 0.0000029  | 0.0017339  | 0.0033276  |           |
|                     | $g_{\text{total}}$      | 2.002162   | 2.0039486  | 2.0055334  | 2.0038814 |
| <b><i>pNN5a</i></b> | $g_e$                   | 2.0023193  | 2.0023193  | 2.0023193  |           |
|                     | $\Delta g_{\text{RMC}}$ | -0.0002155 | -0.0002155 | -0.0002155 |           |
|                     | $\Delta g_{\text{DSO}}$ | 0.0000826  | 0.00011    | 0.0000758  |           |
|                     | $\Delta g_{\text{PSO}}$ | 0.0001723  | 0.0017309  | 0.0030977  |           |
|                     | $g_{\text{total}}$      | 2.0023586  | 2.0039447  | 2.0052773  | 2.0038602 |
| <b><i>pNN0b</i></b> | $g_e$                   | 2.0023193  | 2.0023193  | 2.0023193  |           |
|                     | $\Delta g_{\text{RMC}}$ | -0.0002185 | -0.0002185 | -0.0002185 |           |
|                     | $\Delta g_{\text{DSO}}$ | 0.0000441  | 0.0001133  | 0.0001144  |           |
|                     | $\Delta g_{\text{PSO}}$ | 0.0000522  | 0.0018757  | 0.0035661  |           |
|                     | $g_{\text{total}}$      | 2.0021971  | 2.0040898  | 2.0057812  | 2.0040227 |
| <b><i>pNN1b</i></b> | $g_e$                   | 2.0023193  | 2.0023193  | 2.0023193  |           |
|                     | $\Delta g_{\text{RMC}}$ | -0.0002157 | -0.0002157 | -0.0002157 |           |
|                     | $\Delta g_{\text{DSO}}$ | 0.0000435  | 0.0001122  | 0.0001132  |           |
|                     | $\Delta g_{\text{PSO}}$ | 0.0000133  | 0.0018126  | 0.0034453  |           |
|                     | $g_{\text{total}}$      | 2.0021604  | 2.0040284  | 2.005662   | 2.0039503 |
| <b><i>pNN2b</i></b> | $g_e$                   | 2.0023193  | 2.0023193  | 2.0023193  |           |

|                     |                         |            |            |            |           |
|---------------------|-------------------------|------------|------------|------------|-----------|
|                     | $\Delta g_{\text{RMC}}$ | -0.0002152 | -0.0002152 | -0.0002152 |           |
|                     | $\Delta g_{\text{DSO}}$ | 0.0000433  | 0.0001127  | 0.0001133  |           |
|                     | $\Delta g_{\text{PSO}}$ | -0.0000319 | 0.0018045  | 0.0033862  |           |
|                     | $g_{\text{total}}$      | 2.0021154  | 2.0040212  | 2.0056036  | 2.0039134 |
| <b><i>pNN3b</i></b> | $g_{\text{e}}$          | 2.0023193  | 2.0023193  | 2.0023193  |           |
|                     | $\Delta g_{\text{RMC}}$ | -0.0002151 | -0.0002151 | -0.0002151 |           |
|                     | $\Delta g_{\text{DSO}}$ | 0.0000435  | 0.0001126  | 0.000113   |           |
|                     | $\Delta g_{\text{PSO}}$ | -0.0000827 | 0.0018021  | 0.0033828  |           |
|                     | $g_{\text{total}}$      | 2.002065   | 2.0040188  | 2.0055999  | 2.0038946 |
| <b><i>pNN4b</i></b> | $g_{\text{e}}$          | 2.0023193  | 2.0023193  | 2.0023193  |           |
|                     | $\Delta g_{\text{RMC}}$ | -0.0002151 | -0.0002151 | -0.0002151 |           |
|                     | $\Delta g_{\text{DSO}}$ | 0.0000433  | 0.0001126  | 0.0001132  |           |
|                     | $\Delta g_{\text{PSO}}$ | -0.0001371 | 0.0018012  | 0.0033818  |           |
|                     | $g_{\text{total}}$      | 2.0020103  | 2.0040179  | 2.0055992  | 2.0038758 |
| <b><i>pTZ0a</i></b> | $g_{\text{e}}$          | 2.0023193  | 2.0023193  | 2.0023193  |           |
|                     | $\Delta g_{\text{RMC}}$ | -0.0001881 | -0.0001881 | -0.0001881 |           |
|                     | $\Delta g_{\text{DSO}}$ | 0.0000703  | 0.0000986  | 0.000122   |           |
|                     | $\Delta g_{\text{PSO}}$ | -0.0000027 | 0.0017286  | 0.0063989  |           |
|                     | $g_{\text{total}}$      | 2.0021988  | 2.0039584  | 2.0086521  | 2.0049364 |
| <b><i>pTZ1a</i></b> | $g_{\text{e}}$          | 2.0023193  | 2.0023193  | 2.0023193  |           |
|                     | $\Delta g_{\text{RMC}}$ | -0.0001878 | -0.0001878 | -0.0001878 |           |
|                     | $\Delta g_{\text{DSO}}$ | 0.0000727  | 0.0000959  | 0.0001217  |           |
|                     | $\Delta g_{\text{PSO}}$ | -0.000126  | 0.0018511  | 0.0064861  |           |
|                     | $g_{\text{total}}$      | 2.0020783  | 2.0040785  | 2.0087393  | 2.0049654 |
| <b><i>pTZ2a</i></b> | $g_{\text{e}}$          | 2.0023193  | 2.0023193  | 2.0023193  |           |
|                     | $\Delta g_{\text{RMC}}$ | -0.0001877 | -0.0001877 | -0.0001877 |           |
|                     | $\Delta g_{\text{DSO}}$ | 0.0000663  | 0.0001024  | 0.0001216  |           |
|                     | $\Delta g_{\text{PSO}}$ | -0.0001801 | 0.0018413  | 0.0065073  |           |
|                     | $g_{\text{total}}$      | 2.0020178  | 2.0040753  | 2.0087605  | 2.0049512 |
| <b><i>pTZ3a</i></b> | $g_{\text{e}}$          | 2.0023193  | 2.0023193  | 2.0023193  |           |
|                     | $\Delta g_{\text{RMC}}$ | -0.0001877 | -0.0001877 | -0.0001877 |           |
|                     | $\Delta g_{\text{DSO}}$ | 0.0000625  | 0.0001061  | 0.0001217  |           |
|                     | $\Delta g_{\text{PSO}}$ | -0.0002406 | 0.0018372  | 0.006512   |           |
|                     | $g_{\text{total}}$      | 2.0019535  | 2.0040749  | 2.0087652  | 2.0049312 |
| <b><i>pTZ4a</i></b> | $g_{\text{e}}$          | 2.0023193  | 2.0023193  | 2.0023193  |           |

|                     |                         |            |            |            |           |
|---------------------|-------------------------|------------|------------|------------|-----------|
|                     | $\Delta g_{\text{RMC}}$ | -0.0001877 | -0.0001877 | -0.0001877 |           |
|                     | $\Delta g_{\text{DSO}}$ | 0.000074   | 0.0000947  | 0.0001217  |           |
|                     | $\Delta g_{\text{PSO}}$ | -0.0001994 | 0.0017349  | 0.0065094  |           |
|                     | $g_{\text{total}}$      | 2.0020061  | 2.0039612  | 2.0087627  | 2.00491   |
| <b><i>pTZ5a</i></b> | $g_{\text{e}}$          | 2.0023193  | 2.0023193  | 2.0023193  |           |
|                     | $\Delta g_{\text{RMC}}$ | -0.0001877 | -0.0001877 | -0.0001877 |           |
|                     | $\Delta g_{\text{DSO}}$ | 0.0000736  | 0.0000951  | 0.0001216  |           |
|                     | $\Delta g_{\text{PSO}}$ | -0.0002278 | 0.0016921  | 0.0065104  |           |
|                     | $g_{\text{total}}$      | 2.0019773  | 2.0039188  | 2.0087636  | 2.0048866 |
| <b><i>pTZ0b</i></b> | $g_{\text{e}}$          | 2.0023193  | 2.0023193  | 2.0023193  |           |
|                     | $\Delta g_{\text{RMC}}$ | -0.0001882 | -0.0001882 | -0.0001882 |           |
|                     | $\Delta g_{\text{DSO}}$ | 0.0000452  | 0.000123   | 0.0001231  |           |
|                     | $\Delta g_{\text{PSO}}$ | -0.0002701 | 0.0019899  | 0.0062752  |           |
|                     | $g_{\text{total}}$      | 2.0019062  | 2.004244   | 2.0085294  | 2.0048932 |
| <b><i>pTZ1b</i></b> | $g_{\text{e}}$          | 2.0023193  | 2.0023193  | 2.0023193  |           |
|                     | $\Delta g_{\text{RMC}}$ | -0.0001874 | -0.0001874 | -0.0001874 |           |
|                     | $\Delta g_{\text{DSO}}$ | 0.0000452  | 0.0001224  | 0.0001227  |           |
|                     | $\Delta g_{\text{PSO}}$ | -0.0003253 | 0.0019583  | 0.006514   |           |
|                     | $g_{\text{total}}$      | 2.0018518  | 2.0042126  | 2.0087686  | 2.0049444 |
| <b><i>pTZ2b</i></b> | $g_{\text{e}}$          | 2.0023193  | 2.0023193  | 2.0023193  |           |
|                     | $\Delta g_{\text{RMC}}$ | -0.0001872 | -0.0001872 | -0.0001872 |           |
|                     | $\Delta g_{\text{DSO}}$ | 0.0000452  | 0.0001224  | 0.0001226  |           |
|                     | $\Delta g_{\text{PSO}}$ | -0.0003749 | 0.0019528  | 0.006563   |           |
|                     | $g_{\text{total}}$      | 2.0018024  | 2.0042072  | 2.0088176  | 2.0049424 |
| <b><i>pTZ3b</i></b> | $g_{\text{e}}$          | 2.0023193  | 2.0023193  | 2.0023193  |           |
|                     | $\Delta g_{\text{RMC}}$ | -0.0001872 | -0.0001872 | -0.0001872 |           |
|                     | $\Delta g_{\text{DSO}}$ | 0.0000453  | 0.0001224  | 0.0001225  |           |
|                     | $\Delta g_{\text{PSO}}$ | -0.0004258 | 0.0019525  | 0.0065718  |           |
|                     | $g_{\text{total}}$      | 2.0017516  | 2.004207   | 2.0088264  | 2.0049283 |
| <b><i>pTZ4b</i></b> | $g_{\text{e}}$          | 2.0023193  | 2.0023193  | 2.0023193  |           |
|                     | $\Delta g_{\text{RMC}}$ | -0.0001872 | -0.0001872 | -0.0001872 |           |
|                     | $\Delta g_{\text{DSO}}$ | 0.0000453  | 0.0001224  | 0.0001225  |           |
|                     | $\Delta g_{\text{PSO}}$ | -0.0004773 | 0.0019549  | 0.0065719  |           |
|                     | $g_{\text{total}}$      | 2.0017001  | 2.0042094  | 2.0088265  | 2.004912  |

**Table. S8** Calculated zero-field splitting parameters for the T<sub>1</sub> state of the molecules without stable radical moiety by UB3LYP/6-31G (d, p).

|                          | $D_{ss} / \text{cm}^{-1}$ | $E_{ss} / \text{cm}^{-1}$ |
|--------------------------|---------------------------|---------------------------|
| An-ph                    | 0.03818                   | 0.00047                   |
| An-ph(CCph) <sub>1</sub> | 0.03728                   | 0.00057                   |
| An-ph(CCph) <sub>2</sub> | 0.03711                   | 0.00059                   |
| An-ph(CCph) <sub>3</sub> | 0.03707                   | 0.00060                   |
| An-ph(CCph) <sub>4</sub> | 0.03706                   | 0.00060                   |
| An-ph(CCph) <sub>5</sub> | 0.03704                   | 0.00061                   |
| An-(CCph) <sub>1</sub>   | 0.03142                   | 0.00353                   |
| An-(CCph) <sub>2</sub>   | 0.02960                   | 0.00415                   |
| An-(CCph) <sub>3</sub>   | 0.02931                   | 0.00424                   |
| An-(CCph) <sub>4</sub>   | 0.02926                   | 0.00426                   |
| An-(CCph) <sub>5</sub>   | 0.02925                   | 0.00426                   |

**Table. S9.** Calculated zero-field splitting parameters for the Q state of anthracene-radical linked  $\pi$ -conjugated spin systems by UB3LYP/6-31G (d, p).

|              | $D_{SS} / \text{cm}^{-1}$ | $E_{SS} / \text{cm}^{-1}$ |
|--------------|---------------------------|---------------------------|
| <i>pIN0a</i> | 0.01402                   | 0.00201                   |
| <i>pIN1a</i> | 0.01259                   | 0.00054                   |
| <i>pIN2a</i> | 0.01245                   | 0.0003                    |
| <i>pIN3a</i> | 0.01239                   | 0.00024                   |
| <i>pIN4a</i> | 0.01236                   | 0.00022                   |
| <i>pIN5a</i> | 0.01236                   | 0.00021                   |
| <i>pIN0b</i> | 0.01302                   | 0.00259                   |
| <i>pIN1b</i> | 0.01033                   | 0.00173                   |
| <i>pIN2b</i> | 0.00988                   | 0.00152                   |
| <i>pIN3b</i> | 0.00979                   | 0.00146                   |
| <i>pIN4b</i> | 0.00977                   | 0.00144                   |
| <i>pOV0a</i> | 0.01402                   | 0.00206                   |
| <i>pOV1a</i> | 0.01263                   | 0.00053                   |
| <i>pOV2a</i> | 0.01244                   | 0.0003                    |
| <i>pOV3a</i> | 0.01239                   | 0.00024                   |
| <i>pOV4a</i> | 0.01236                   | 0.00022                   |
| <i>pOV5a</i> | 0.01236                   | 0.00021                   |
| <i>pOV0b</i> | 0.0133                    | 0.0028                    |
| <i>pOV1b</i> | 0.01035                   | 0.00177                   |
| <i>pOV2b</i> | 0.00988                   | 0.00152                   |
| <i>pOV3b</i> | 0.00979                   | 0.00146                   |
| <i>pOV4b</i> | 0.00977                   | 0.00144                   |
| <i>mNO0a</i> | 0.01532                   | 0.00318                   |
| <i>mNO1a</i> | 0.01274                   | 0.00066                   |
| <i>mNO2a</i> | 0.01245                   | 0.00033                   |
| <i>mNO3a</i> | 0.01238                   | 0.00025                   |
| <i>mNO4a</i> | 0.01238                   | 0.00022                   |
| <i>mNO5a</i> | 0.01236                   | 0.00021                   |

|                     |         |         |
|---------------------|---------|---------|
| <b><i>mNO0b</i></b> | 0.01358 | 0.00176 |
| <b><i>mNO1b</i></b> | 0.01253 | 0.00051 |
| <b><i>mNO2b</i></b> | 0.0124  | 0.0003  |
| <b><i>mNO3b</i></b> | 0.01236 | 0.00022 |
| <b><i>mNO4b</i></b> | 0.01238 | 0.00021 |
| <b><i>pNN0a</i></b> | 0.01287 | 0.00165 |
| <b><i>pNN1a</i></b> | 0.01025 | 0.00163 |
| <b><i>pNN2a</i></b> | 0.00986 | 0.0015  |
| <b><i>pNN3a</i></b> | 0.00979 | 0.00146 |
| <b><i>pNN4a</i></b> | 0.00977 | 0.00144 |
| <b><i>pNN5a</i></b> | 0.01383 | 0.00185 |
| <b><i>pNN0b</i></b> | 0.01258 | 0.00051 |
| <b><i>pNN1b</i></b> | 0.01239 | 0.0003  |
| <b><i>pNN2b</i></b> | 0.01235 | 0.00024 |
| <b><i>pNN3b</i></b> | 0.01236 | 0.00022 |
| <b><i>pNN4b</i></b> | 0.01236 | 0.00021 |
| <b><i>pTZ0a</i></b> | 0.01280 | 0.00265 |
| <b><i>pTZ1a</i></b> | 0.01027 | 0.00175 |
| <b><i>pTZ2a</i></b> | 0.00986 | 0.00152 |
| <b><i>pTZ3a</i></b> | 0.00979 | 0.00146 |
| <b><i>pTZ4a</i></b> | 0.00977 | 0.00144 |
| <b><i>pTZ5a</i></b> | 0.01402 | 0.00201 |
| <b><i>pTZ0b</i></b> | 0.01259 | 0.00054 |
| <b><i>pTZ1b</i></b> | 0.01245 | 0.0003  |
| <b><i>pTZ2b</i></b> | 0.01239 | 0.00024 |
| <b><i>pTZ3b</i></b> | 0.01236 | 0.00022 |
| <b><i>pTZ4b</i></b> | 0.01236 | 0.00021 |

**Table. S10.** Calculated zero-field splitting parameters of the Q state of anthracene-radical linked  $\pi$ -conjugated spin systems by ROBP/ESR-II.

| <b>Sample</b> | $D_{SS} / \text{cm}^{-1}$ | $E_{SS} / \text{cm}^{-1}$ |
|---------------|---------------------------|---------------------------|
| <i>pIN0a</i>  | 0.01401                   | 0.00141                   |
| <i>pIN1a</i>  | 0.01222                   | 0.00017                   |
| <i>pIN2a</i>  | 0.01184                   | 0.00012                   |
| <i>pIN3a</i>  | 0.01163                   | 0.00019                   |
| <i>pIN4a</i>  | 0.01150                   | 0.00021                   |
| <i>pIN5a</i>  | 0.01161                   | 0.00027                   |
| <i>pIN0b</i>  | 0.01385                   | 0.00252                   |
| <i>pIN1b</i>  | 0.01070                   | 0.00207                   |
| <i>pIN2b</i>  | 0.00969                   | 0.00192                   |
| <i>pIN3b</i>  | 0.00934                   | 0.00185                   |
| <i>pIN4b</i>  | 0.00921                   | 0.00182                   |
| <i>pOV0a</i>  | 0.01394                   | 0.00151                   |
| <i>pOV1a</i>  | 0.01236                   | 0.00017                   |
| <i>pOV2a</i>  | 0.01186                   | 0.00009                   |
| <i>pOV3a</i>  | 0.01167                   | 0.00018                   |
| <i>pOV4a</i>  | 0.01153                   | 0.00021                   |
| <i>pOV5a</i>  | 0.01161                   | 0.00027                   |
| <i>pOV0b</i>  | 0.01439                   | 0.00279                   |
| <i>pOV1b</i>  | 0.01079                   | 0.00218                   |
| <i>pOV2b</i>  | 0.00970                   | 0.00195                   |
| <i>pOV3b</i>  | 0.00934                   | 0.00186                   |
| <i>pOV4b</i>  | 0.00921                   | 0.00183                   |
| <i>mNO0a</i>  | 0.01539                   | 0.00236                   |
| <i>mNO1a</i>  | 0.01254                   | 0.00021                   |
| <i>mNO2a</i>  | 0.01198                   | 0.00013                   |
| <i>mNO3a</i>  | 0.01171                   | 0.00020                   |
| <i>mNO4a</i>  | 0.01159                   | 0.00023                   |
| <i>mNO5a</i>  | 0.01148                   | 0.00023                   |
| <i>mNO0b</i>  | 0.01532                   | 0.00232                   |



|                     |         |         |
|---------------------|---------|---------|
| <b><i>mNO1b</i></b> | 0.01112 | 0.00195 |
| <b><i>mNO2b</i></b> | 0.00983 | 0.00189 |
| <b><i>mNO3b</i></b> | 0.00939 | 0.00185 |
| <b><i>mNO4b</i></b> | 0.00923 | 0.00183 |
| <b><i>pNN0a</i></b> | 0.01353 | 0.00115 |
| <b><i>pNN1a</i></b> | 0.01214 | 0.00006 |
| <b><i>pNN2a</i></b> | 0.01165 | 0.00011 |
| <b><i>pNN3a</i></b> | 0.01158 | 0.00019 |
| <b><i>pNN4a</i></b> | 0.01153 | 0.00023 |
| <b><i>pNN5a</i></b> | 0.01164 | 0.00028 |
| <b><i>pNN0b</i></b> | 0.01385 | 0.00151 |
| <b><i>pNN1b</i></b> | 0.01063 | 0.00185 |
| <b><i>pNN2b</i></b> | 0.00966 | 0.00186 |
| <b><i>pNN3b</i></b> | 0.00933 | 0.00184 |
| <b><i>pNN4b</i></b> | 0.00921 | 0.00182 |
| <b><i>pTZ0a</i></b> | --      | --      |
| <b><i>pTZ1a</i></b> | --      | --      |
| <b><i>pTZ2a</i></b> | --      | --      |
| <b><i>pTZ3a</i></b> | --      | --      |
| <b><i>pTZ4a</i></b> | --      | --      |
| <b><i>pTZ5a</i></b> | --      | --      |
| <b><i>pTZ0b</i></b> | --      | --      |
| <b><i>pTZ1b</i></b> | --      | --      |
| <b><i>pTZ2b</i></b> | --      | --      |
| <b><i>pTZ3b</i></b> | --      | --      |
| <b><i>pTZ4b</i></b> | --      | --      |

**Table. S11.** Calculated zero-field splitting (zfs) parameters of the Q state of anthracene-radical linked  $\pi$ -conjugated spin systems by UCAM-B3LYP/def2-TZVB. The contributions from the spin-orbit (SO) interaction in the zfs parameters were calculated by the PK method.<sup>10</sup>  $D_{SO}$  and  $E_{SO}$  are corrected using the pre-factors proposed by van Wüllen<sup>11</sup> in the relationship,  $D_{SO}(\text{van Wüllen}) = D_{SO}(\text{PK}) \times 2S/(2S - 1)$ .

| Sample       | $D_{SS} / \text{cm}^{-1}$ | $E_{SS} / \text{cm}^{-1}$ | $D_{SO} / \text{cm}^{-1}$ | $E_{SO} / \text{cm}^{-1}$ |
|--------------|---------------------------|---------------------------|---------------------------|---------------------------|
| <i>pIN0a</i> | 0.01307                   | 0.00282                   | 0.00093                   | 0.00005                   |
| <i>pIN1a</i> | 0.01159                   | 0.00135                   | 0.00037                   | 0.00026                   |
| <i>pIN2a</i> | 0.01143                   | 0.00113                   | -0.00048                  | 0.00064                   |
| <i>pIN3a</i> | 0.01128                   | 0.00111                   | -0.00038                  | 0.00055                   |
| <i>pIN4a</i> | 0.01113                   | 0.00113                   | -0.00032                  | 0.00056                   |
| <i>pIN5a</i> | 0.01099                   | 0.00116                   | 0.00229                   | -0.00034                  |
| <i>pIN0b</i> | 0.01218                   | 0.00273                   | 0.00416                   | -0.00111                  |
| <i>pIN1b</i> | 0.00998                   | 0.00168                   | 0.0045                    | -0.00114                  |
| <i>pIN2b</i> | 0.00972                   | 0.00144                   | 0.00473                   | -0.00099                  |
| <i>pIN3b</i> | 0.00968                   | 0.00132                   | 0.00502                   | -0.00096                  |
| <i>pIN4b</i> | 0.00962                   | 0.00072                   | 0.00511                   | -0.00045                  |
| <i>pOV0a</i> | 0.01357                   | 0.00269                   | 0.00127                   | 0.00107                   |
| <i>pOV1a</i> | 0.01210                   | 0.00119                   | 0.00206                   | 0.00082                   |
| <i>pOV2a</i> | 0.01197                   | 0.00098                   | 0.0003                    | 0.00157                   |
| <i>pOV3a</i> | 0.01187                   | 0.00095                   | 0.0003                    | 0.00158                   |
| <i>pOV4a</i> | 0.01177                   | 0.00096                   | 0.00038                   | 0.00157                   |
| <i>pOV5a</i> | 0.01167                   | 0.00098                   | 0.00052                   | 0.00161                   |
| <i>pOV0b</i> | 0.01232                   | 0.0029                    | 0.00369                   | 0.0002                    |
| <i>pOV1b</i> | 0.00997                   | 0.00176                   | 0.0039                    | 0.00023                   |
| <i>pOV2b</i> | 0.00973                   | 0.00156                   | 0.00423                   | 0.0002                    |
| <i>pOV3b</i> | 0.00969                   | 0.00152                   | 0.00468                   | 0.00015                   |
| <i>pOV4b</i> | 0.00967                   | 0.0015                    | 0.00496                   | 0.00009                   |
| <i>mNO0a</i> | -0.01327                  | -0.00544                  | -0.00356                  | -0.00006                  |
| <i>mNO1a</i> | 0.01228                   | 0.00130                   | 0.00219                   | 0.00198                   |
| <i>mNO2a</i> | 0.01195                   | 0.00101                   | 0.00233                   | 0.00197                   |

|              |          |          |          |          |
|--------------|----------|----------|----------|----------|
| <i>mNO3a</i> | 0.01182  | 0.00097  | 0.00251  | 0.00195  |
| <i>mNO4a</i> | 0.01178  | 0.00095  | 0.00179  | 0.00215  |
| <i>mNO5a</i> | 0.01181  | 0.00093  | 0.00087  | 0.00259  |
| <i>mNO0b</i> | 0.01370  | 0.00287  | 0.00411  | 0.00092  |
| <i>mNO1b</i> | 0.01016  | 0.00180  | 0.00441  | 0.00108  |
| <i>mNO2b</i> | 0.00974  | 0.00157  | 0.00464  | 0.00109  |
| <i>mNO3b</i> | 0.00966  | 0.00151  | 0.00492  | 0.00100  |
| <i>mNO4b</i> | 0.00963  | 0.00148  | 0.00512  | 0.00092  |
| <i>pNN0a</i> | 0.01236  | 0.00278  | 0.00399  | -0.00069 |
| <i>pNN1a</i> | 0.01127  | 0.00141  | 0.00452  | -0.00087 |
| <i>pNN2a</i> | 0.01022  | 0.00152  | 0.00225  | -0.00006 |
| <i>pNN3a</i> | 0.00990  | 0.00157  | 0.00163  | 0.00027  |
| <i>pNN4a</i> | 0.01095  | 0.00082  | 0.00520  | -0.00045 |
| <i>pNN5a</i> | 0.01164  | 0.00028  | -0.00136 | 0.00281  |
| <i>pNN0b</i> | 0.01206  | 0.00201  | 0.00623  | -0.00150 |
| <i>pNN1b</i> | 0.00991  | 0.00168  | 0.00649  | -0.00152 |
| <i>pNN2b</i> | 0.00974  | -0.00150 | 0.00684  | 0.00156  |
| <i>pNN3b</i> | 0.00968  | -0.00120 | 0.00704  | 0.00136  |
| <i>pNN4b</i> | 0.00969  | -0.00147 | 0.00735  | 0.00169  |
| <i>pTZ0a</i> | -0.01037 | 0.00079  | -0.09113 | -0.01332 |
| <i>pTZ1a</i> | -0.00778 | 0.00057  | -0.08970 | -0.01367 |
| <i>pTZ2a</i> | -0.00741 | -0.00120 | -0.08881 | -0.01342 |
| <i>pTZ3a</i> | -0.00734 | -0.00229 | -0.09078 | -0.01251 |
| <i>pTZ4a</i> | -0.00731 | 0.00125  | -0.09052 | -0.01479 |
| <i>pTZ5a</i> | -0.00729 | 0.00119  | -0.09174 | -0.01365 |
| <i>pTZ0b</i> | -0.01004 | -0.00458 | -0.08843 | -0.01421 |
| <i>pTZ1b</i> | -0.00755 | -0.00409 | -0.08921 | -0.01506 |
| <i>pTZ2b</i> | -0.00717 | -0.00408 | -0.08974 | -0.01518 |
| <i>pTZ3b</i> | -0.00708 | -0.00409 | -0.09082 | -0.01453 |
| <i>pTZ4b</i> | -0.00703 | -0.00408 | -0.08921 | -0.01550 |

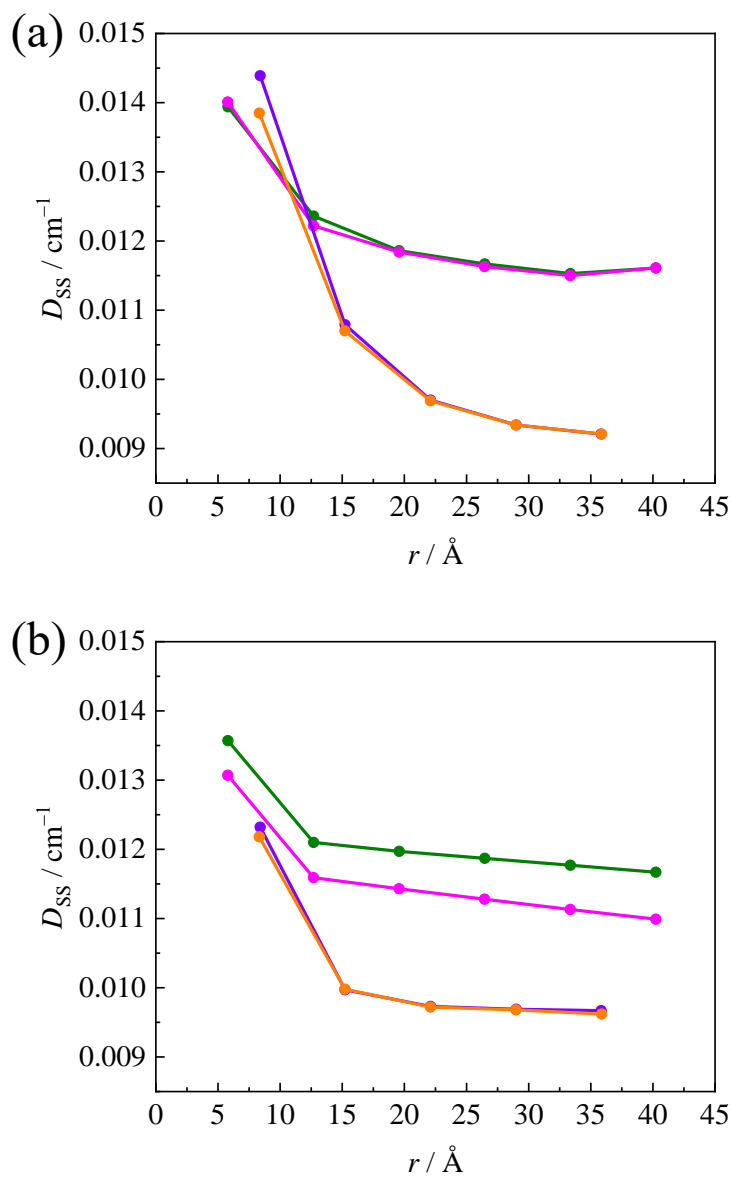

**Fig. S7.** Calculated  $D$  values of the Q state of  $pOVna$  (green),  $pINna$  (pink),  $pOVnb$  (violet), and  $pINnb$  (orange) series, by (a) ROBP/ESR-II and (b) UCAM-B3LYP/def2-TZVB.

## References

1. Y. Teki, S. Miyamoto, M. Nakatsuji and Y. Miura, *J. Am. Chem. Soc.*, 2001, **123**, 294-305.
2. Y. Teki, M. Nakatsuji and Y. Miura, *Mol. Phys.*, 2002, **100**, 1385-1394.
3. Y. Teki, S. Miyamoto and K. Koide, *Phys. Chem. Chem. Phys.*, 2015, **17**, 31646-31652.
4. F. A. Neugebauer and H. Fischer, *Angew. Chem. Int. Ed.*, 1980, **19**, 724-725.
5. H. Kobayashi, K. Akiniwa, F. Iwahori, H. Honda, M. Yamamoto, Y. Odanaka and M. Inagaki, *ACS Omega*, 2021, **6**, 20855-20864.
6. N. Kamigata, O. Kawakita, A. Izuoka and M. Kobayashi, *J. Org. Chem.*, 1985, **50**, 398-400.
7. J. H. Osiecki and E. F. Ullman, *J. Am. Chem. Soc.*, 1968, **90**, 1078-1079.
8. S. A. Fairhurst, K. M. Johnson, L. H. Sutcliffe, K. F. Preston, A. J. Banister, Z. V. Hauptman and J. Passmore, *J. Chem. Soc., Dalton Trans.*, 1986, **7**, 1465-1472.
9. J. P. Grivet, *Chem. Phys. Lett.*, 1969, **4**, 104-106.
10. M. R. Pederson, S. N. Khanna, *Phys. Rev. B.*, 1991, **60**, 9566-9572.
11. C. van Wüllen *J. Chem. Phys.*, 2009, **130**, 194109.
